# Supplementary material for: Highly efficient Ru(ii)–alkylidene based Hoveyda–Grubbs catalysts for ring-closing metathesis reactions
Source: Royal Society of Chemistry journal article supplement (doi:10.1039/d1ra07428h), 2021-01-01
Supplement: d1ra07428h1.pdf [file d1ra07428h1.pdf]

**Supporting Information**  
**Highly Efficient Ru(II)-Alkylidene Based Hoveyda-Grubbs Catalysts for Ring-  
Closing Metathesis Reactions**

Mariam Y. Al-Enezi, Elizabeth John, Yehia A. Ibrahim and Nouria A. Al-Awadi\*

*\*Chemistry Department, Kuwait University, P.O. Box 5969, Safat 13060, Kuwait.*

*Email: [na.nabaq.kw@gmail.com](mailto:na.nabaq.kw@gmail.com)*

**Table of Contents**

|                                                                                                      |              |
|------------------------------------------------------------------------------------------------------|--------------|
| NMR Spectra.....                                                                                     | <b>2-22</b>  |
| Mass spectra.....                                                                                    | <b>22-30</b> |
| Deconvoluted HRMS (ESI) .....                                                                        | <b>30-39</b> |
| Single Crystal X-ray Diffraction Studies of the Ru complexes <b>7a</b> , <b>7b</b> & <b>7c</b> ..... | <b>40-42</b> |

# NMR spectra

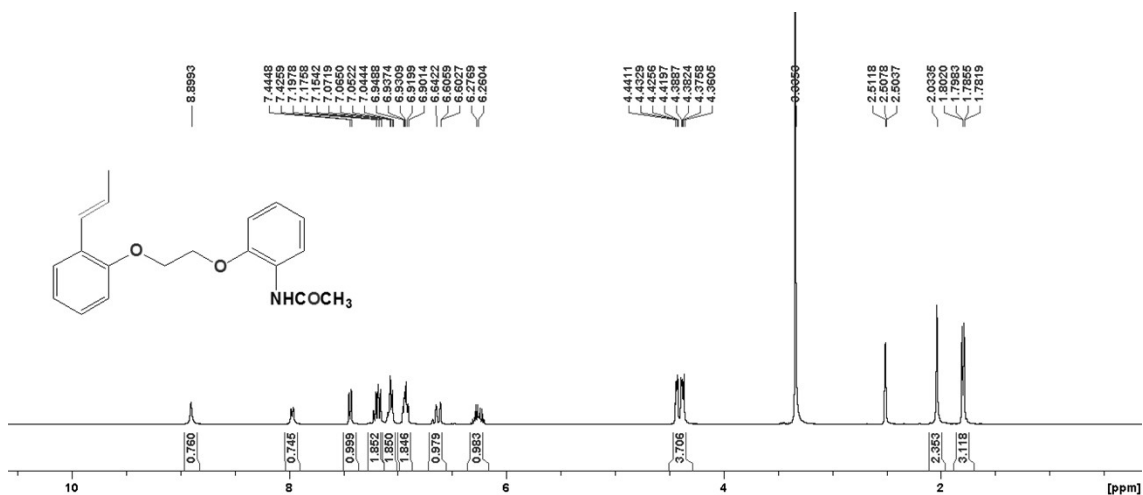

Figure S1. <sup>1</sup>H-NMR spectrum of 6a in DMSO-d<sub>6</sub> at 25 °C.

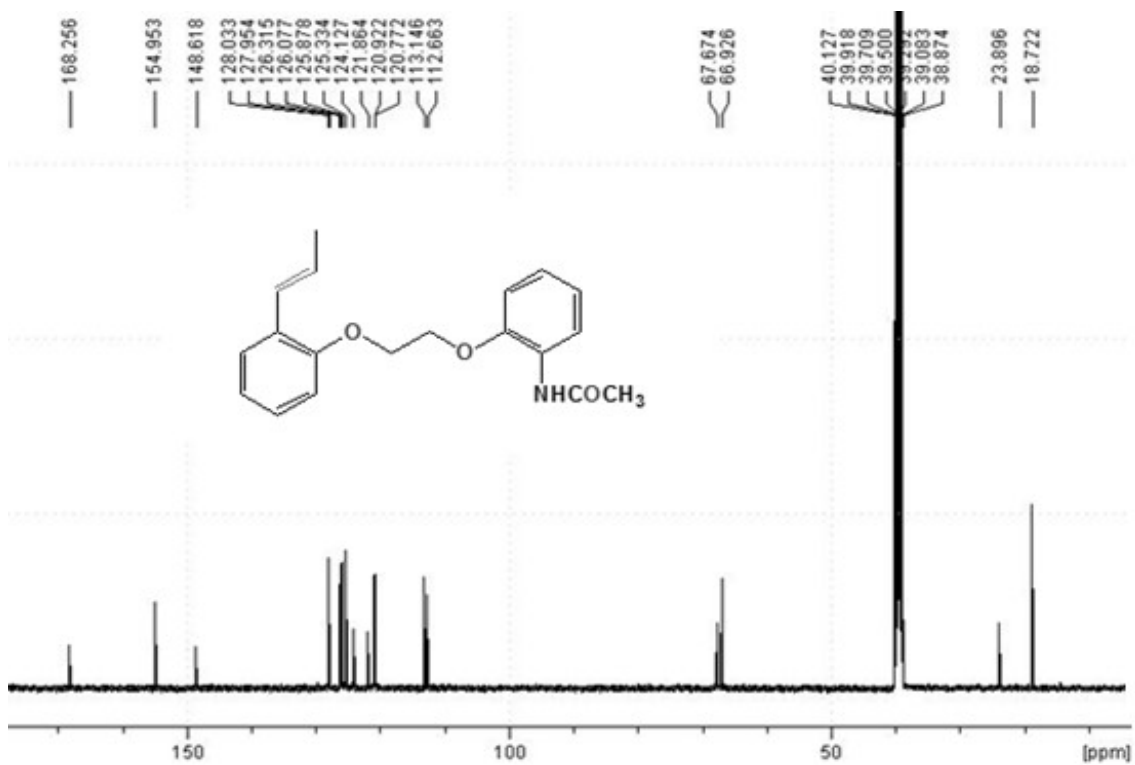

Figure S2. <sup>13</sup>C-NMR spectrum of 6a in DMSO-d<sub>6</sub> at 25 °C.

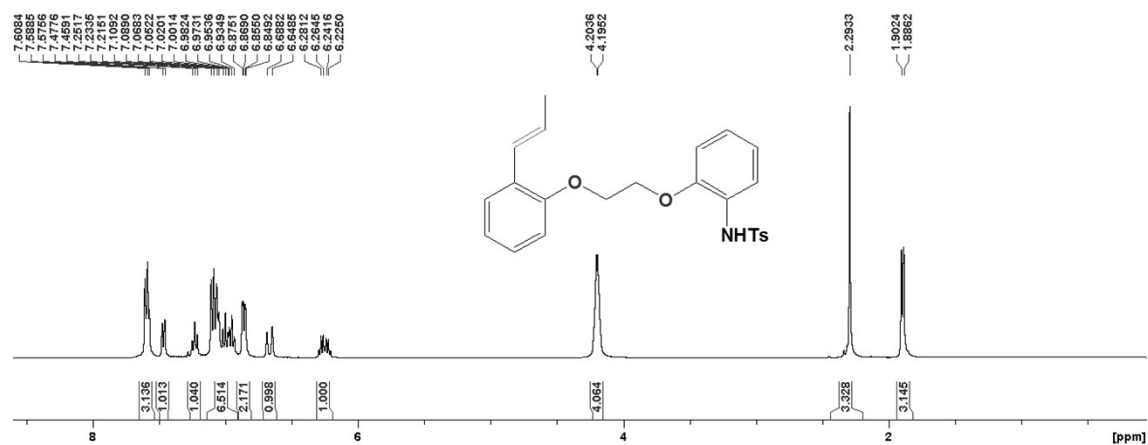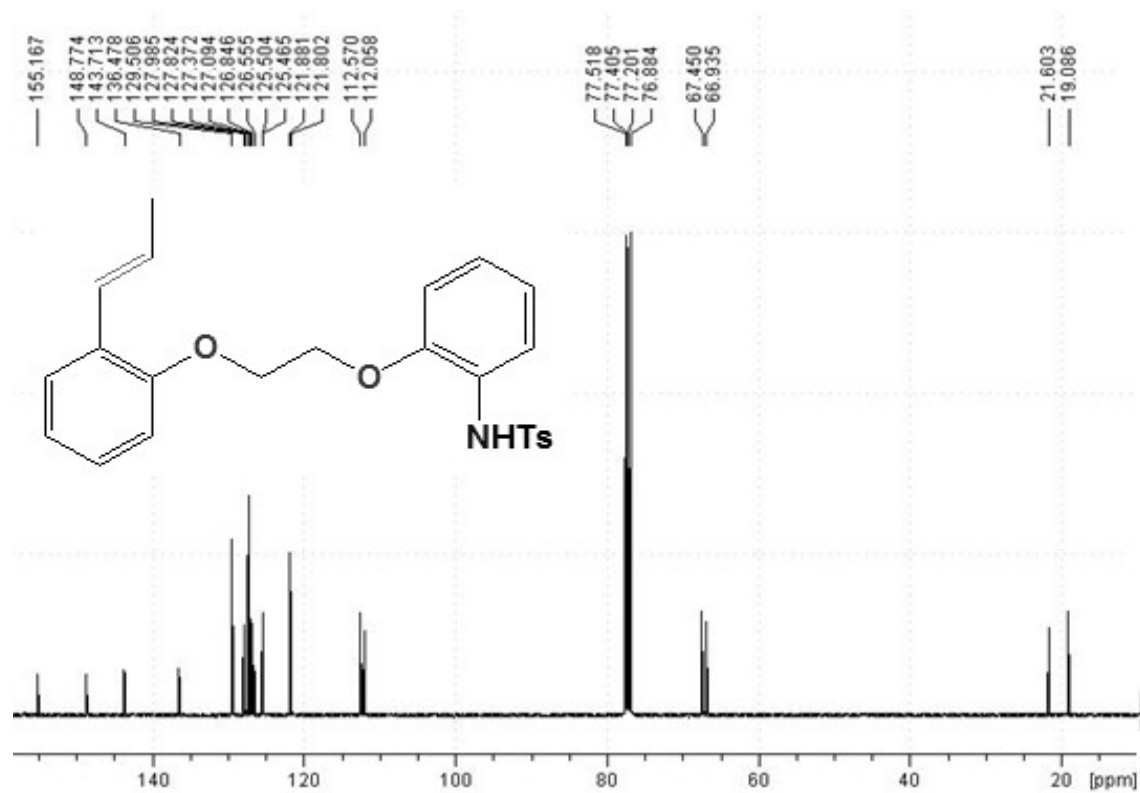

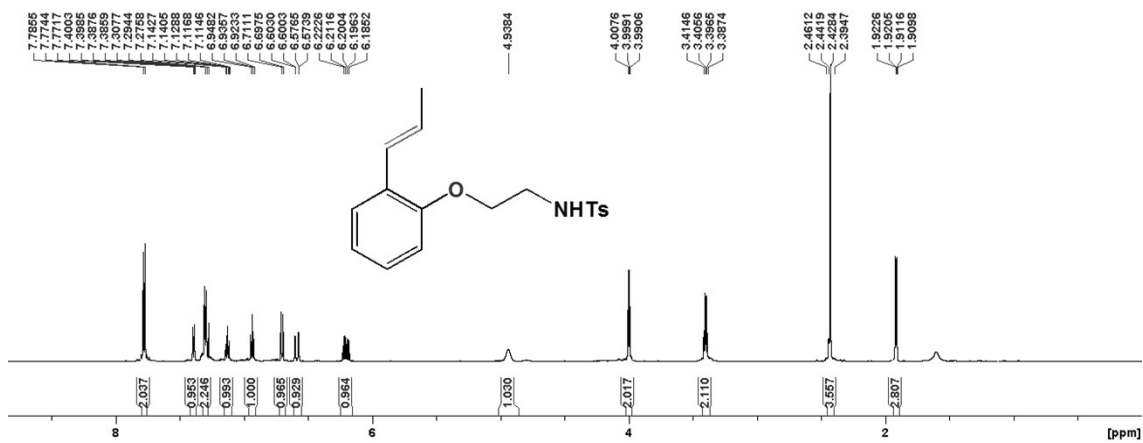

Figure S5. <sup>1</sup>H-NMR spectrum of **6c** in CDCl<sub>3</sub> at 25 °C.

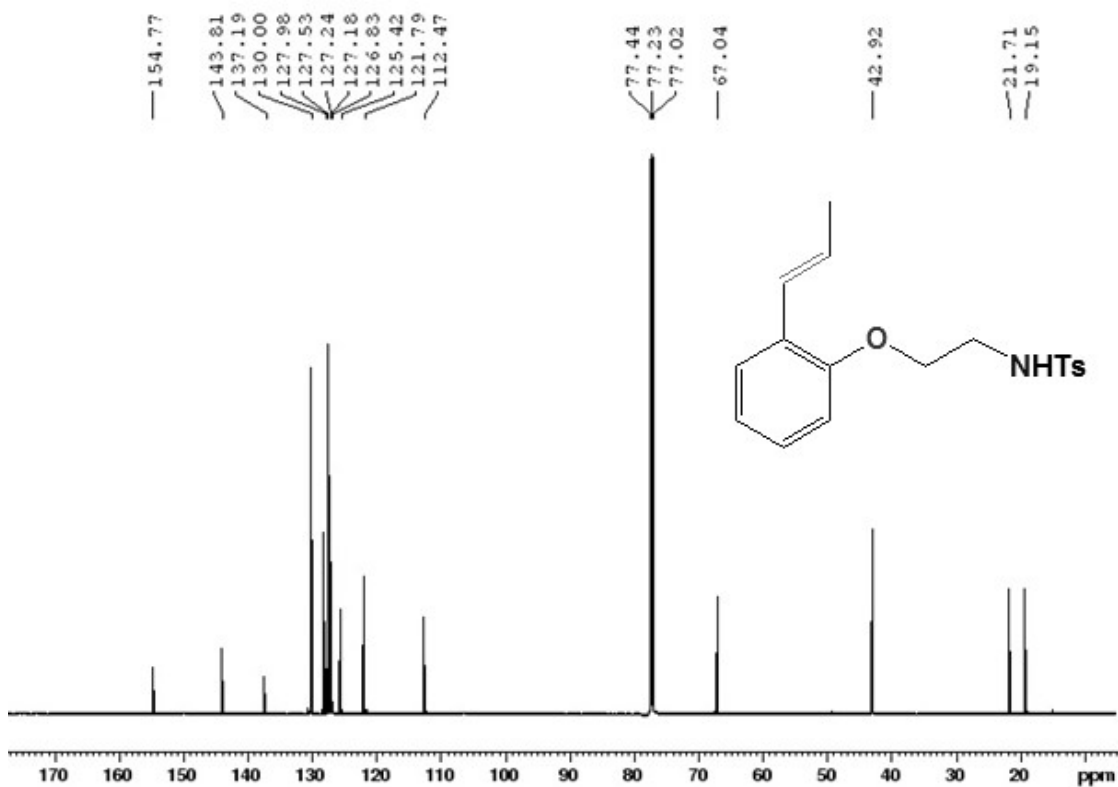

Figure S6. <sup>13</sup>C-NMR spectrum of **6c** in CDCl<sub>3</sub> at 25 °C.

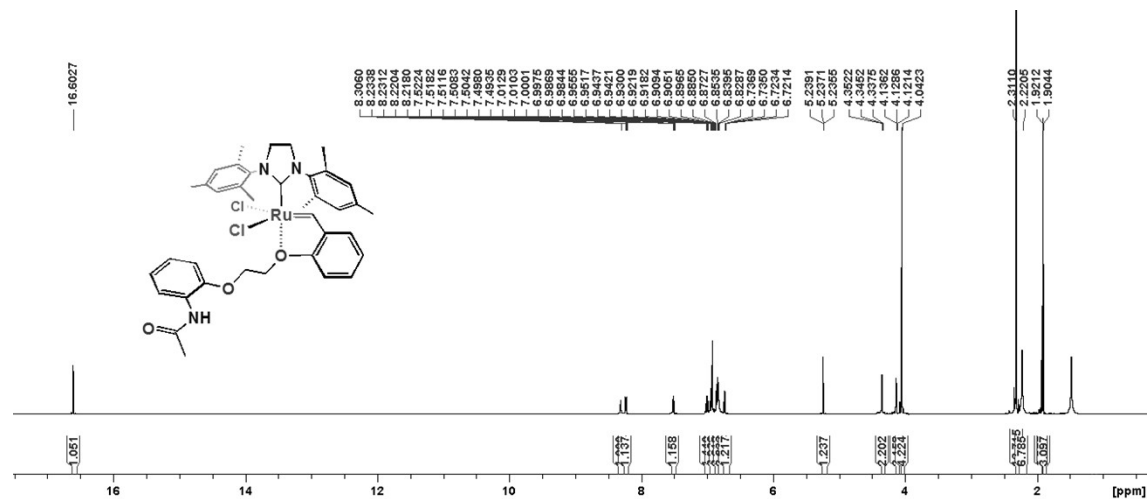

Figure S7. <sup>1</sup>H-NMR spectrum of **7a** in CD<sub>2</sub>Cl<sub>2</sub> at 25 °C.

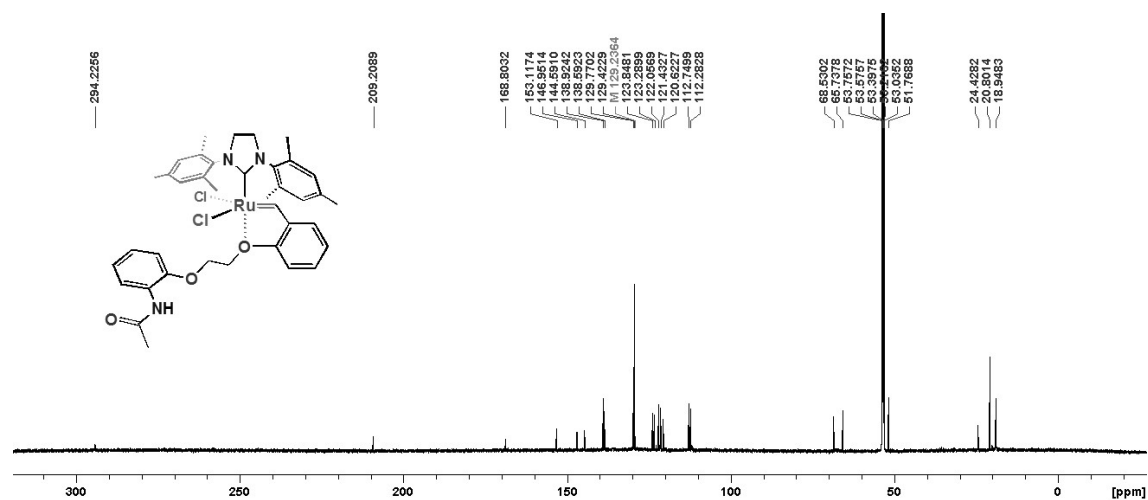

Figure S8. <sup>13</sup>C-NMR spectrum of **7a** in CD<sub>2</sub>Cl<sub>2</sub> at 25 °C.

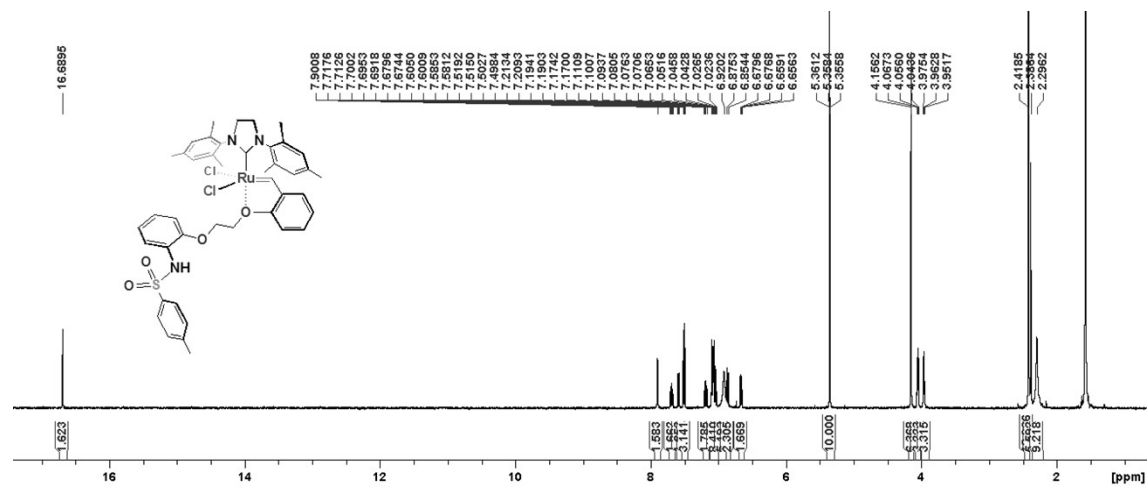

**Figure S9.**  $^1\text{H-NMR}$  spectrum of **7b** in  $\text{CD}_2\text{Cl}_2$  at  $25\text{ }^\circ\text{C}$ .

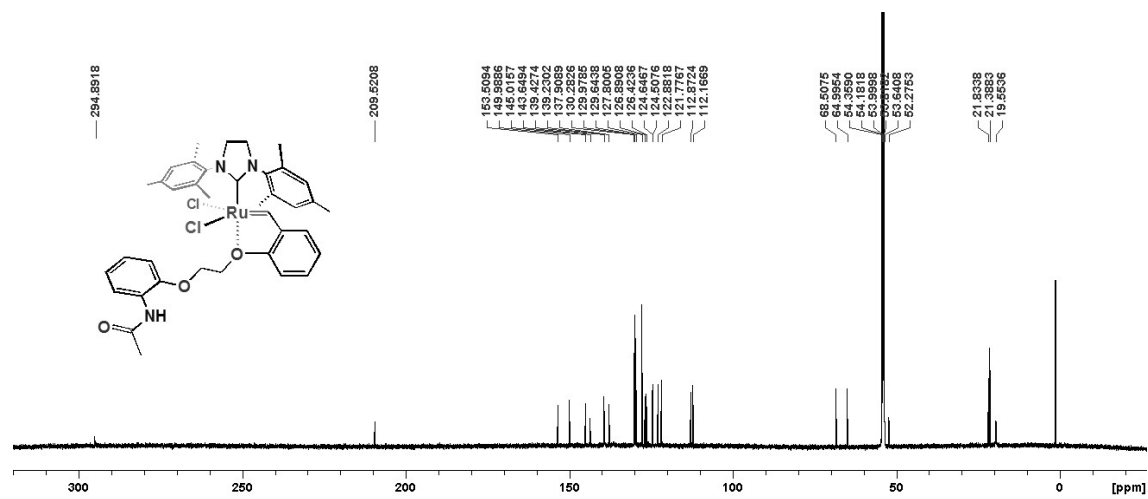

**Figure S10.**  $^{13}\text{C-NMR}$  spectrum of **7b** in  $\text{CD}_2\text{Cl}_2$  at  $25\text{ }^\circ\text{C}$ .

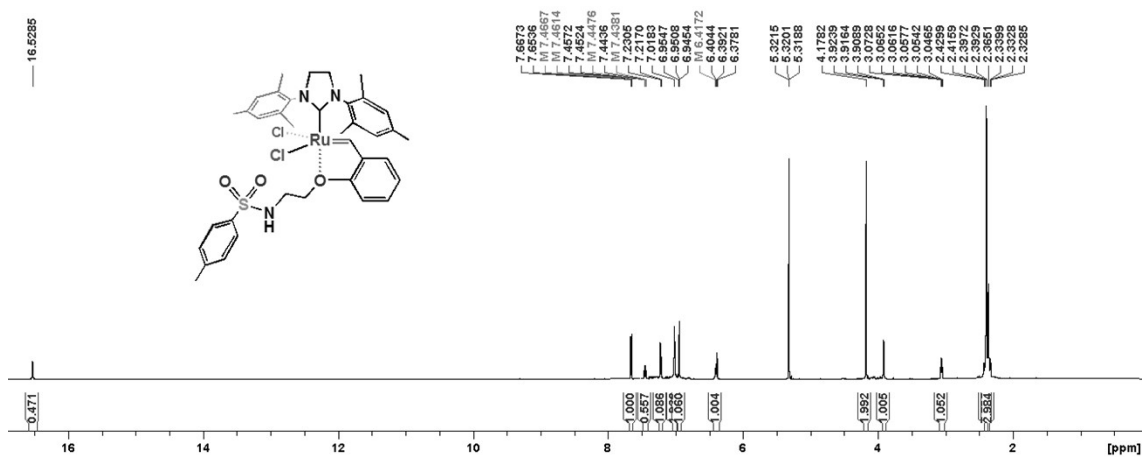

Figure S11. <sup>1</sup>H-NMR spectrum of **7c** in CD<sub>2</sub>Cl<sub>2</sub> at 25 °C.

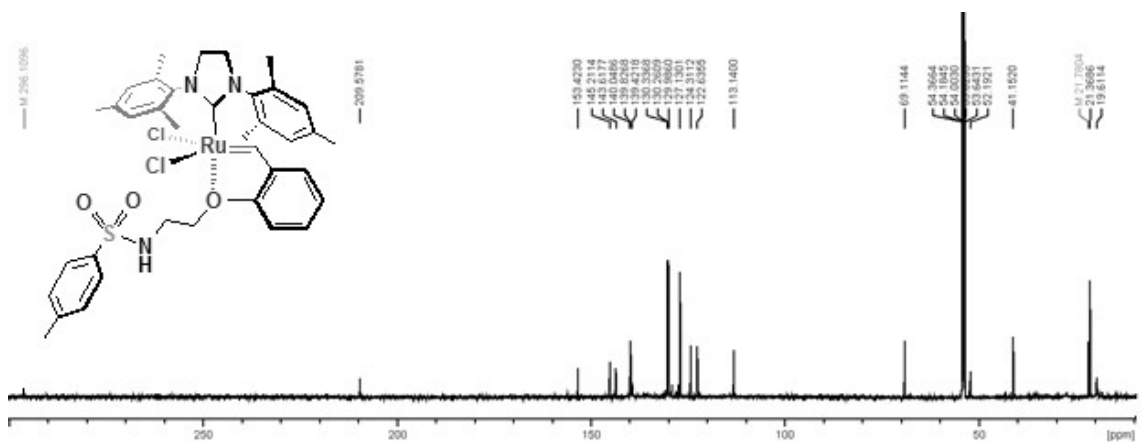

Figure S12. <sup>13</sup>C-NMR spectrum of **7c** in CD<sub>2</sub>Cl<sub>2</sub> at 25 °C.

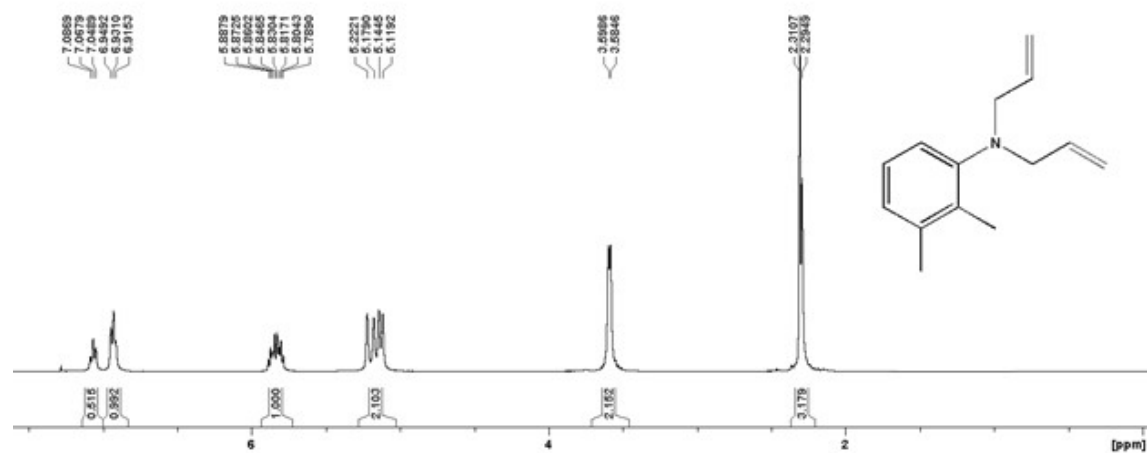

Figure S13.  $^1\text{H-NMR}$  spectrum of **8i** in  $\text{CDCl}_3$  at  $25\text{ }^\circ\text{C}$ .

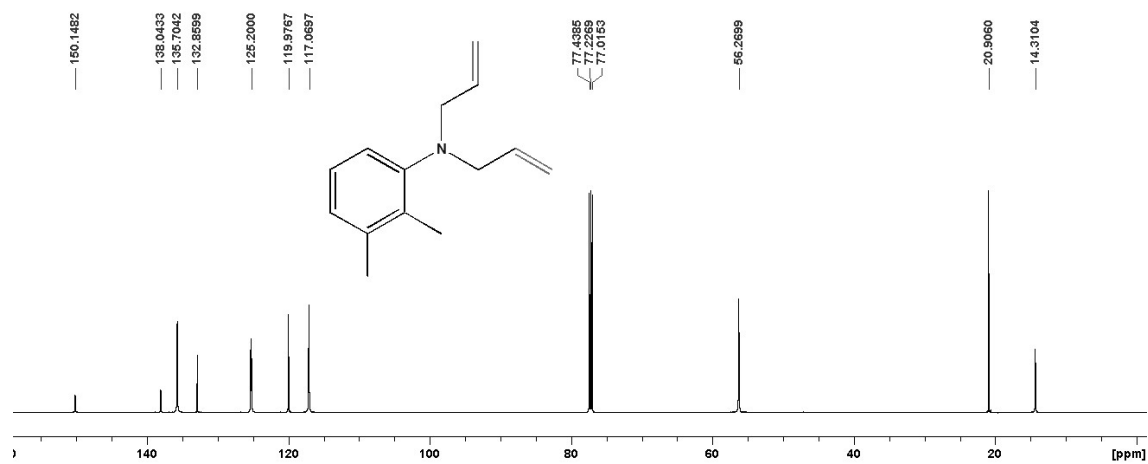

Figure S14.  $^{13}\text{C-NMR}$  spectrum of **8i** in  $\text{CDCl}_3$  at  $25\text{ }^\circ\text{C}$ .



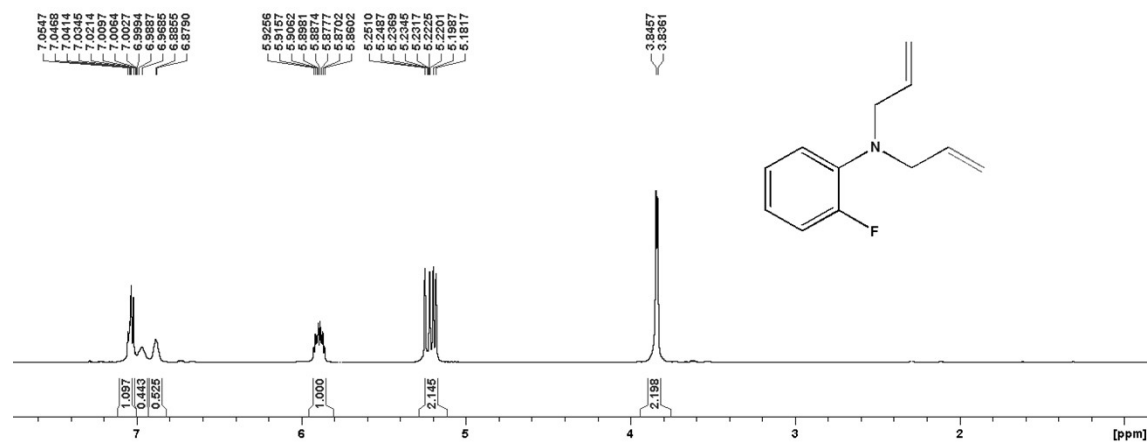

Figure S15. <sup>1</sup>H-NMR spectrum of **8k** in CDCl<sub>3</sub> at 25 °C.

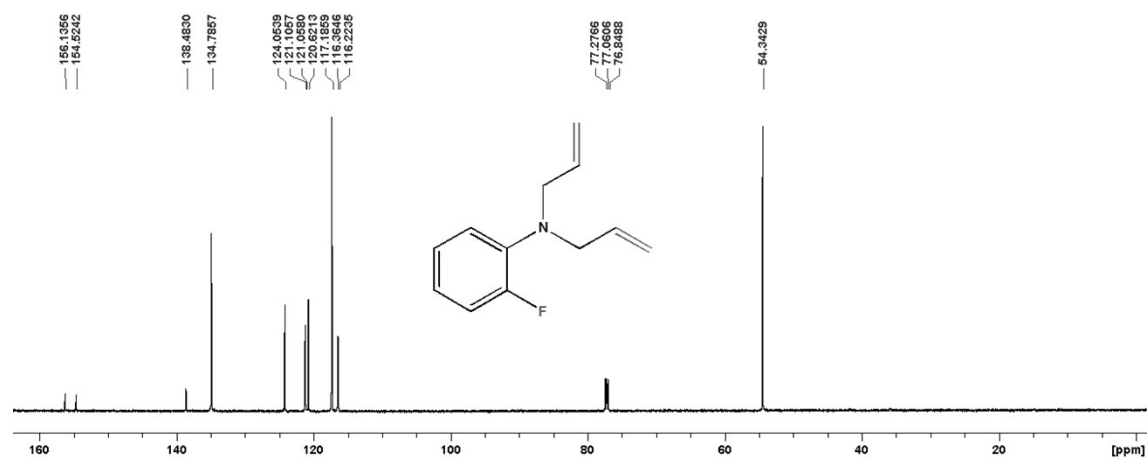

Figure S16. <sup>13</sup>C-NMR spectrum of **8k** in CDCl<sub>3</sub> at 25 °C.

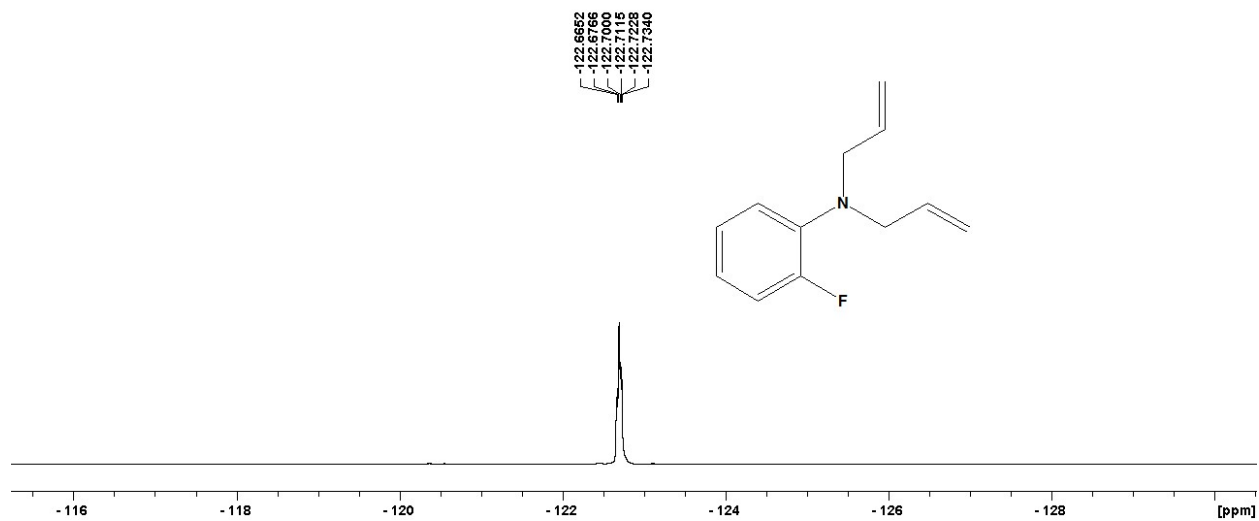

Figure S17. <sup>19</sup>F NMR spectrum of **8k** in CDCl<sub>3</sub> at 25 °C.

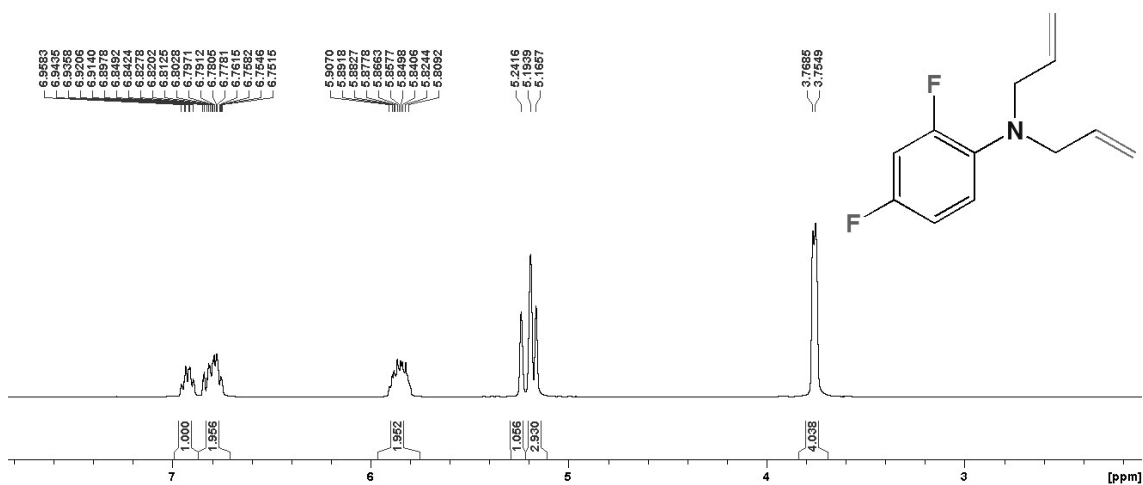

Figure S18. <sup>1</sup>H-NMR spectrum of **8o** in CDCl<sub>3</sub> at 25 °C.

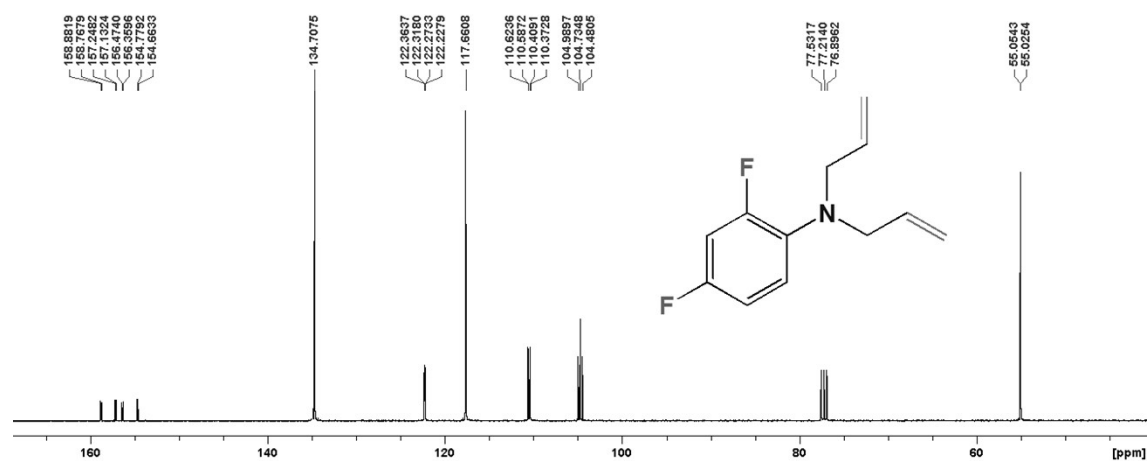

Figure S19.  $^{13}\text{C}$ -NMR spectrum of **8o** in  $\text{CDCl}_3$  at  $25\text{ }^\circ\text{C}$ .

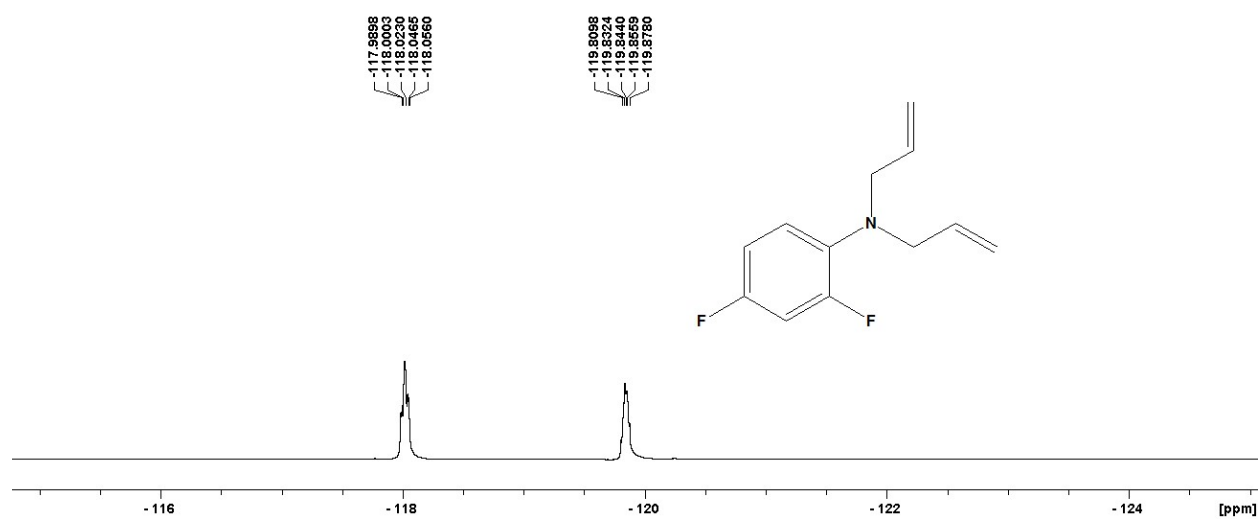

Figure S20.  $^{19}\text{F}$  NMR spectrum of **8o** in  $\text{CDCl}_3$  at  $25\text{ }^\circ\text{C}$ .

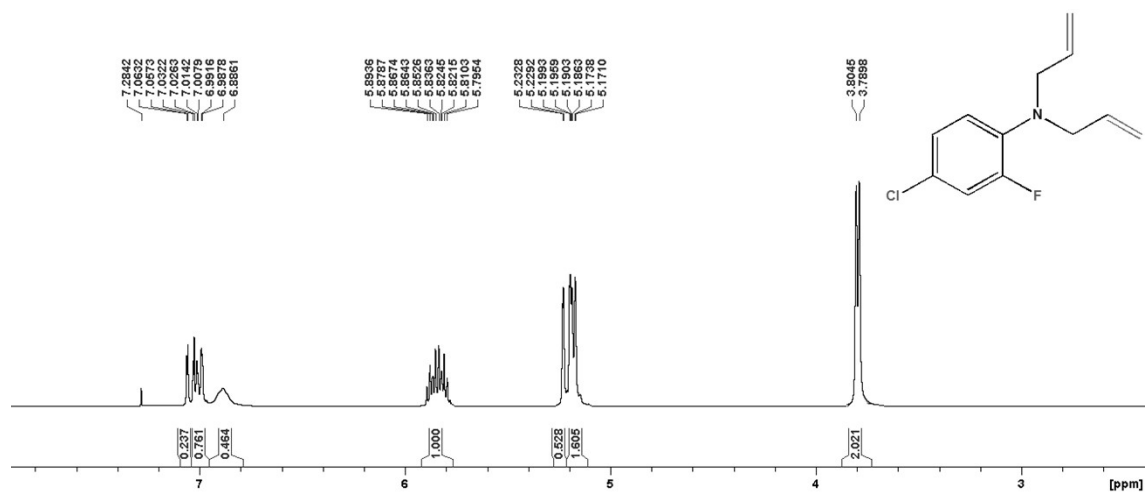

Figure S21.  $^1\text{H-NMR}$  spectrum of **8q** in  $\text{CDCl}_3$  at  $25\text{ }^\circ\text{C}$ .

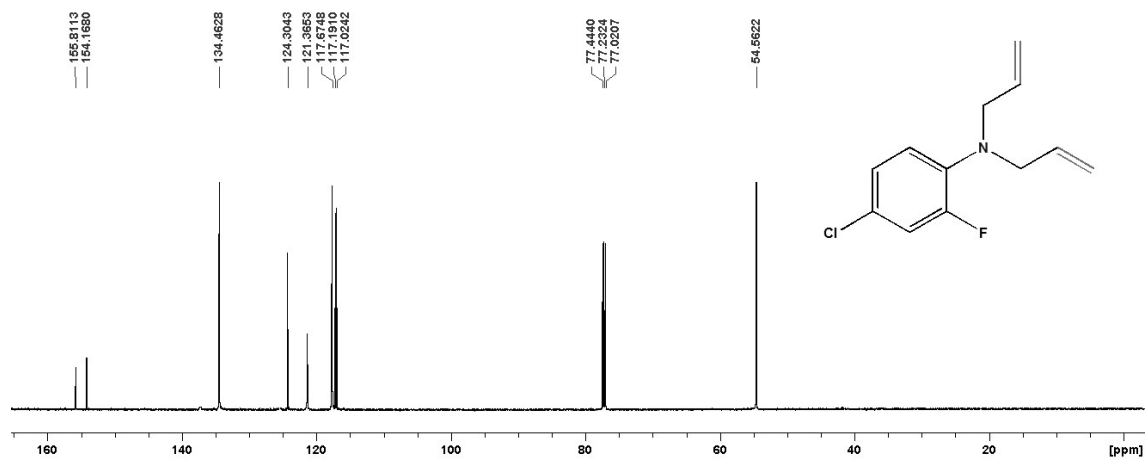

Figure S22.  $^{13}\text{C-NMR}$  spectrum of **8q** in  $\text{CDCl}_3$  at  $25\text{ }^\circ\text{C}$ .

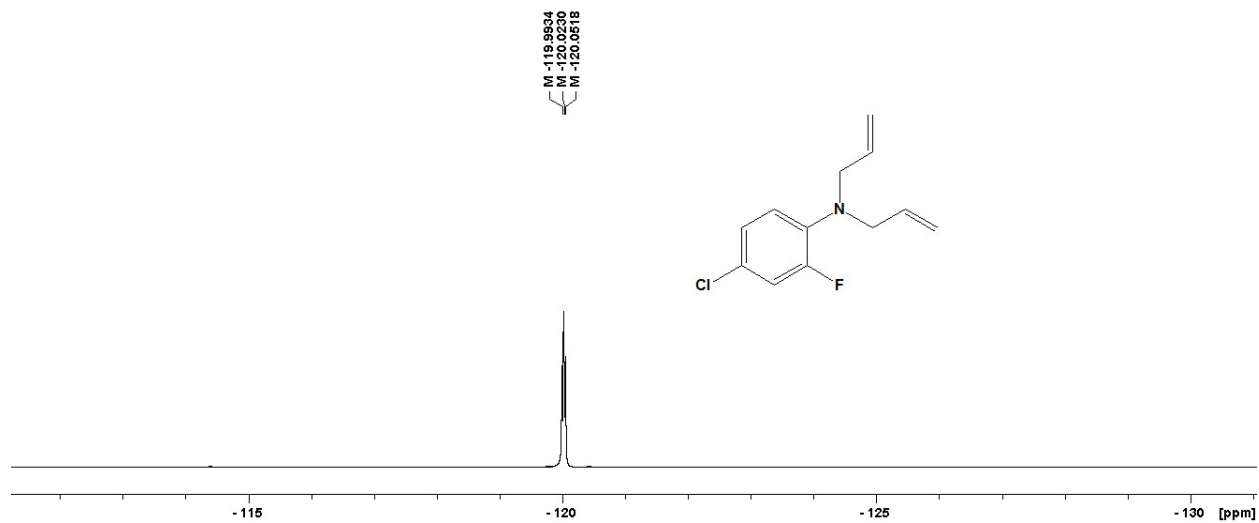

Figure S23. <sup>19</sup>F NMR spectrum of **8q** in CDCl<sub>3</sub> at 25 °C.

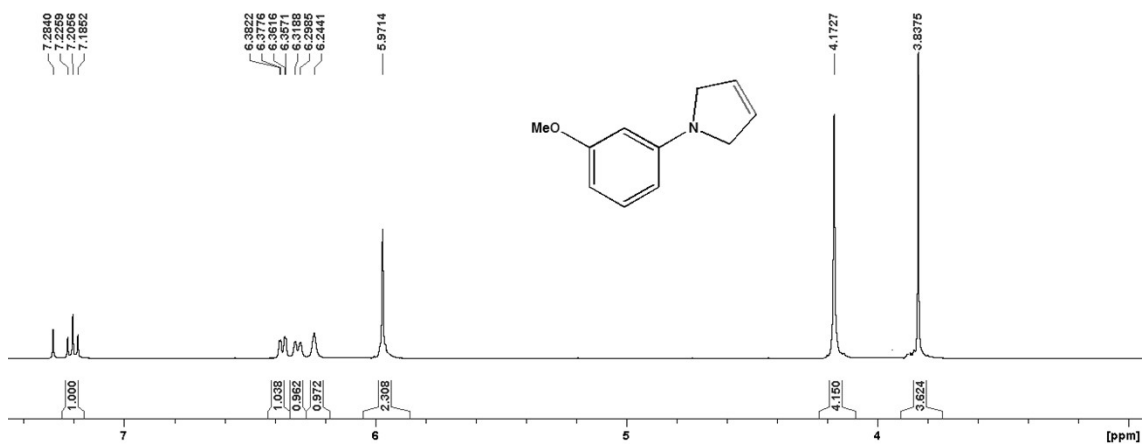

Figure S24. <sup>1</sup>H-NMR spectrum of **9f** in CDCl<sub>3</sub> at 25 °C.

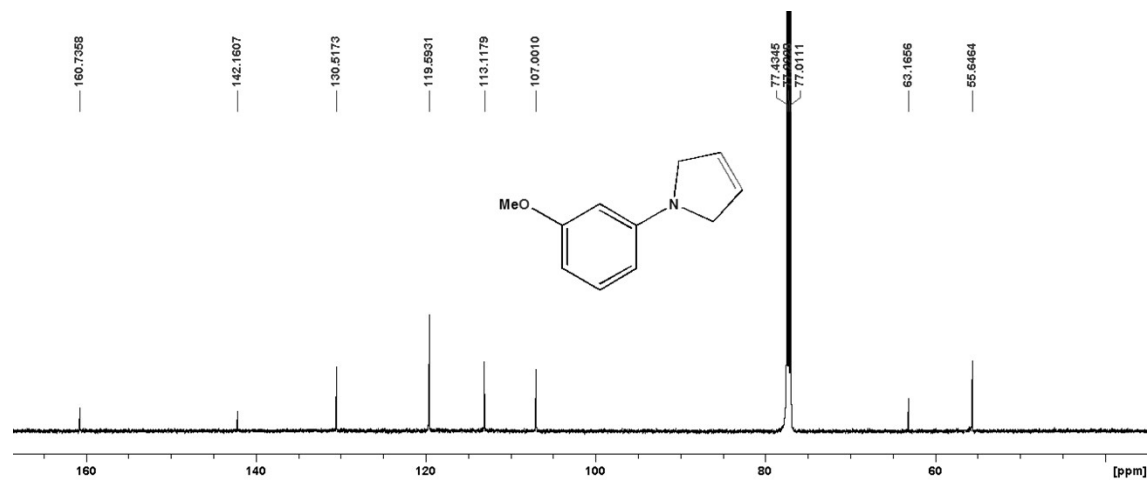

Figure S25. <sup>13</sup>C-NMR spectrum of **9f** in CDCl<sub>3</sub> at 25 °C.

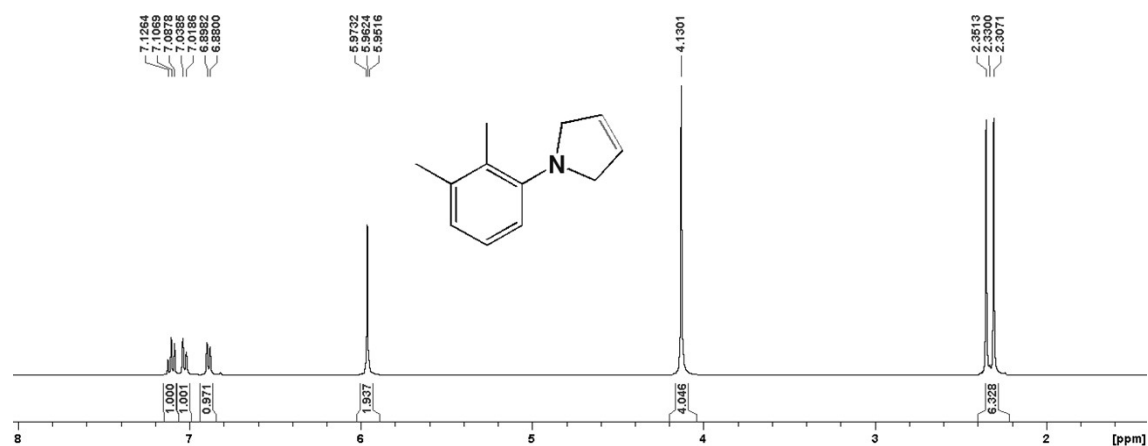

Figure S26. <sup>1</sup>H-NMR spectrum of **9i** in CDCl<sub>3</sub> at 25 °C.

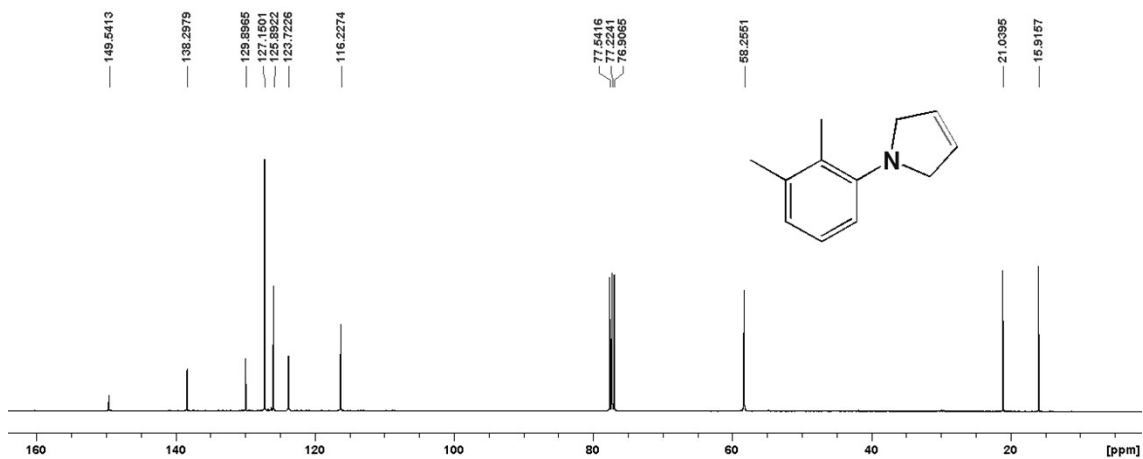

Figure S27.  $^{13}\text{C}$ -NMR spectrum of **9i** in  $\text{CDCl}_3$  at  $25\text{ }^\circ\text{C}$ .

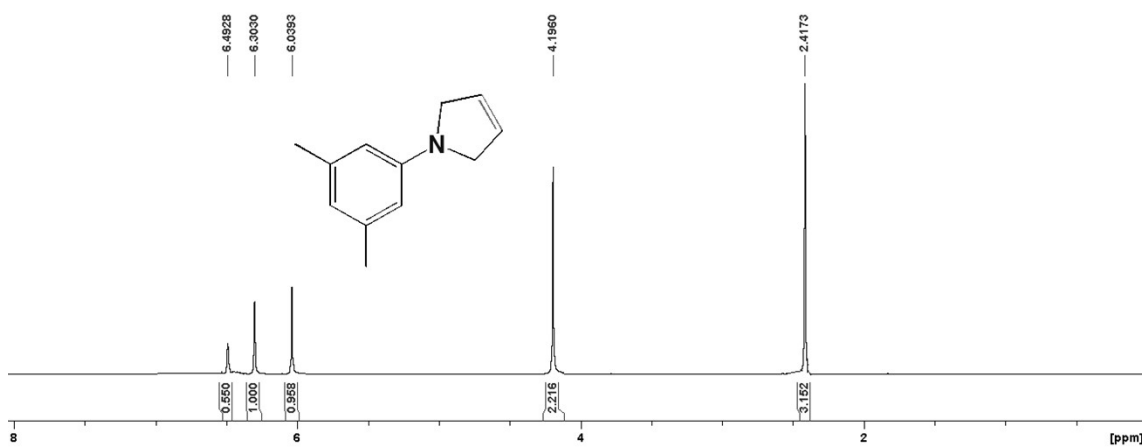

Figure S28.  $^1\text{H}$ -NMR spectrum of **9j** in  $\text{CDCl}_3$  at  $25\text{ }^\circ\text{C}$ .

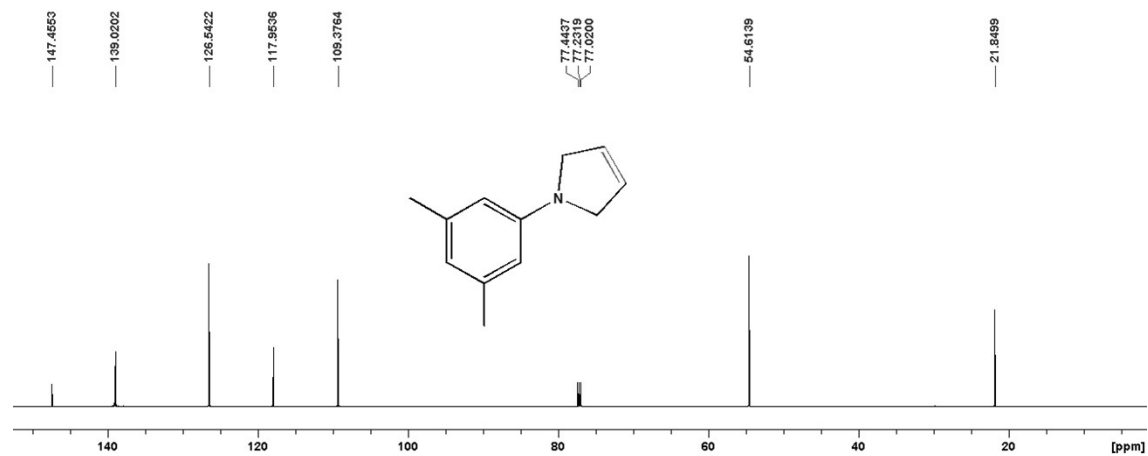

Figure S29.  $^{13}\text{C-NMR}$  spectrum of 9j in  $\text{CDCl}_3$  at  $25\text{ }^\circ\text{C}$ .

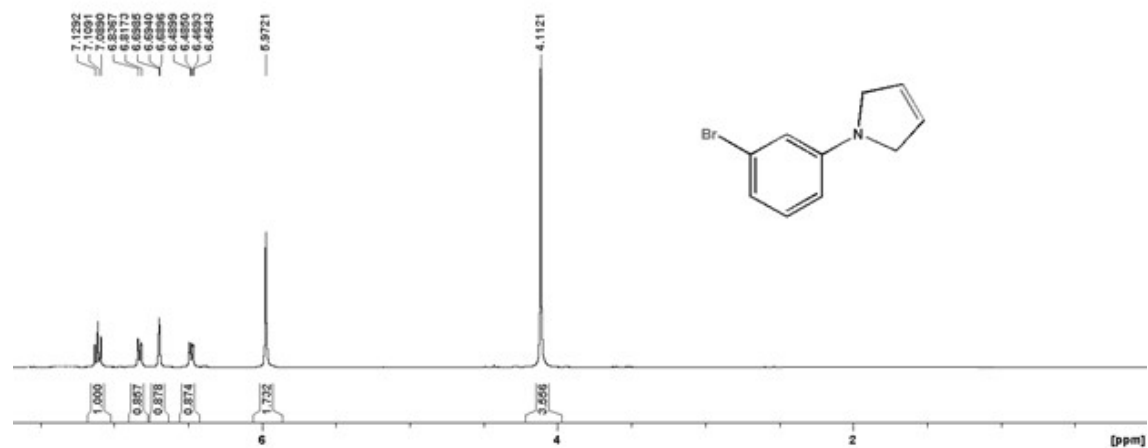

Figure S30.  $^1\text{H-NMR}$  spectrum of 9l in  $\text{CDCl}_3$  at  $25\text{ }^\circ\text{C}$ .



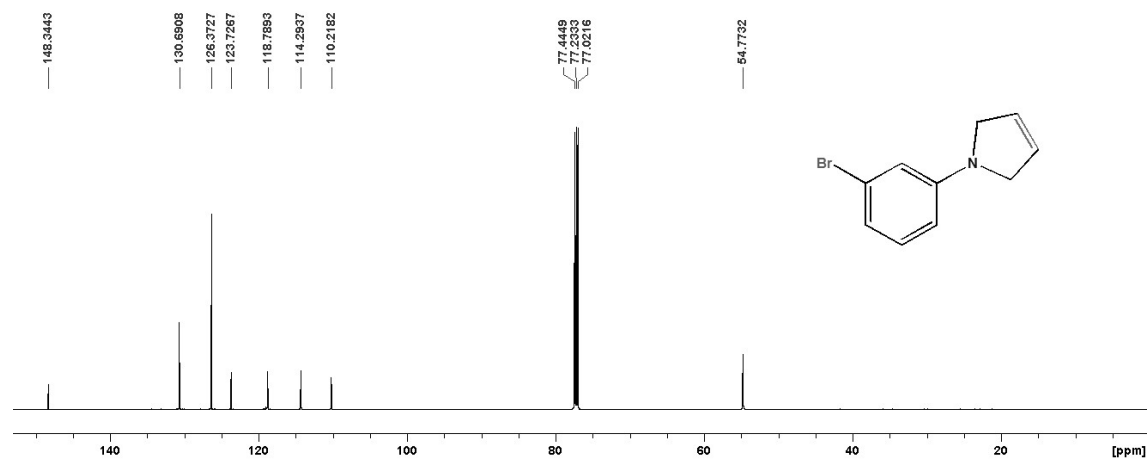

Figure S31.  $^{13}\text{C}$ -NMR spectrum of **9l** in  $\text{CDCl}_3$  at  $25\text{ }^\circ\text{C}$ .

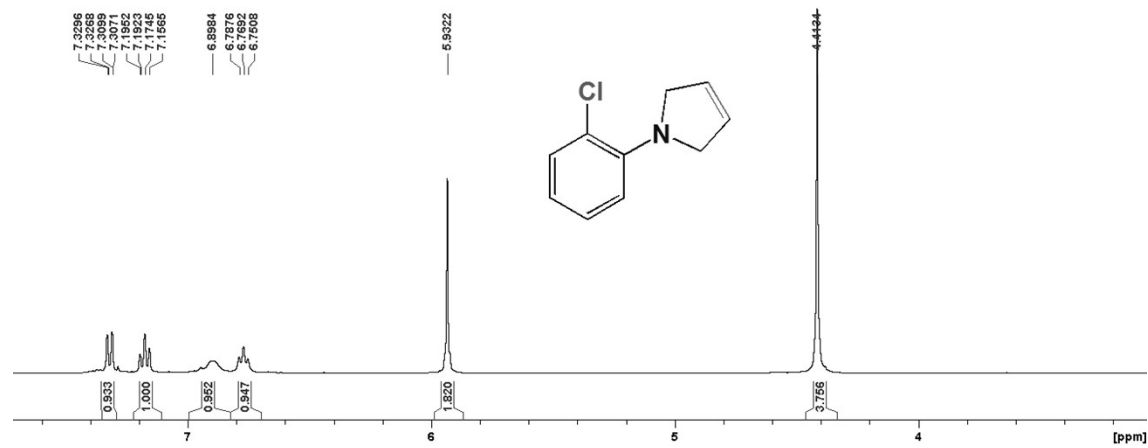

Figure S32.  $^1\text{H}$ -NMR spectrum of **9m** in  $\text{CDCl}_3$  at  $25\text{ }^\circ\text{C}$ .

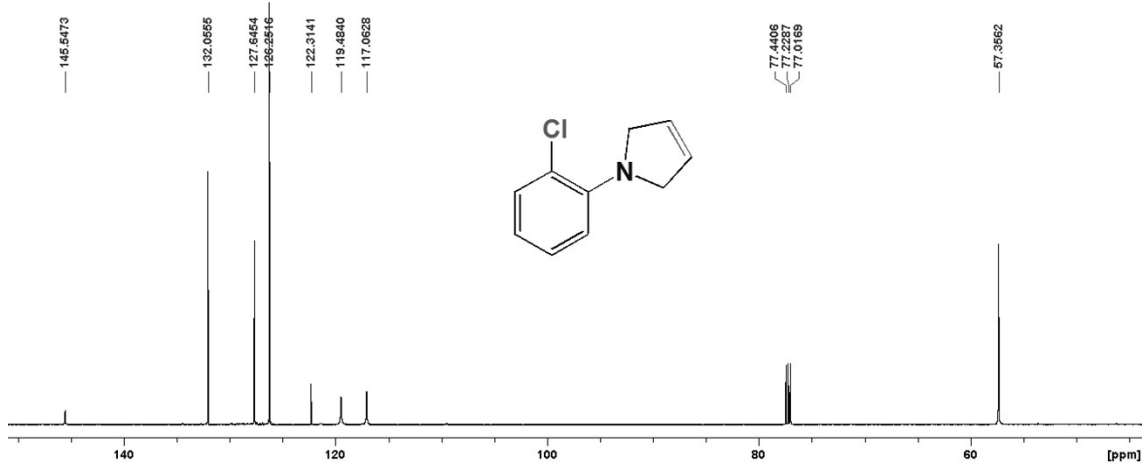

Figure S33.  $^{13}\text{C}$ -NMR spectrum of **9m** in  $\text{CDCl}_3$  at 25  $^\circ\text{C}$ .

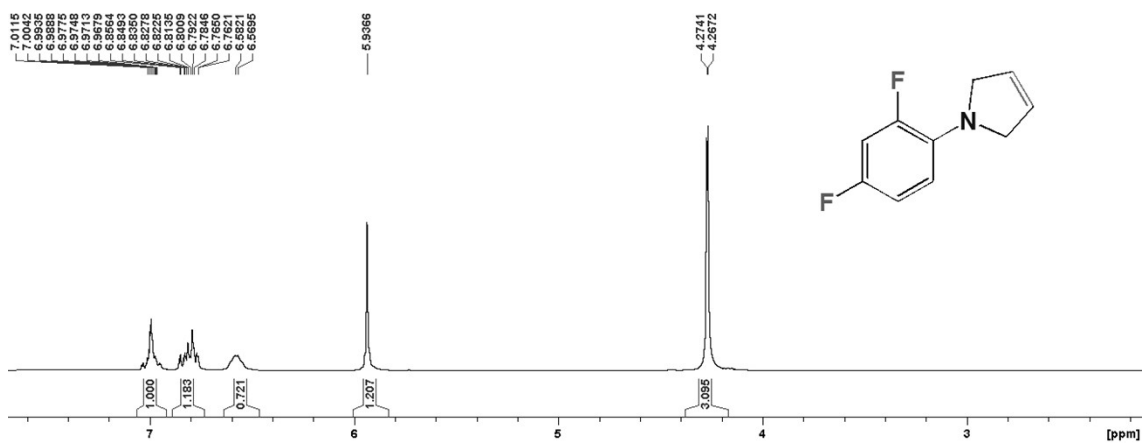

Figure S34.  $^1\text{H}$ -NMR spectrum of **9o** in  $\text{CDCl}_3$  at 25  $^\circ\text{C}$ .

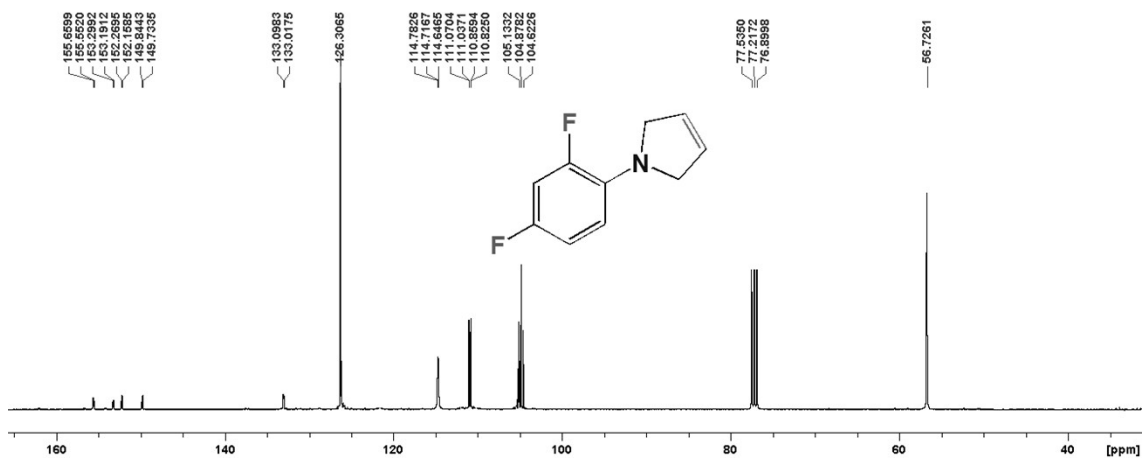

Figure S35. <sup>13</sup>C-NMR spectrum of **9o** in CDCl<sub>3</sub> at 25 °C.

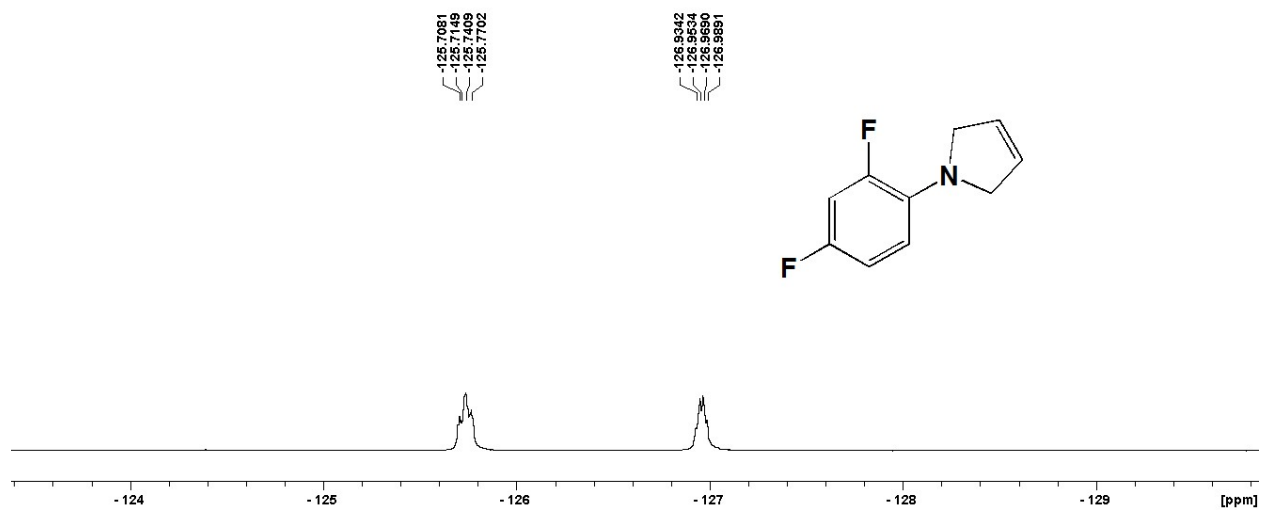

Figure S36. <sup>19</sup>F NMR spectrum of **9o** in CDCl<sub>3</sub> at 25 °C.

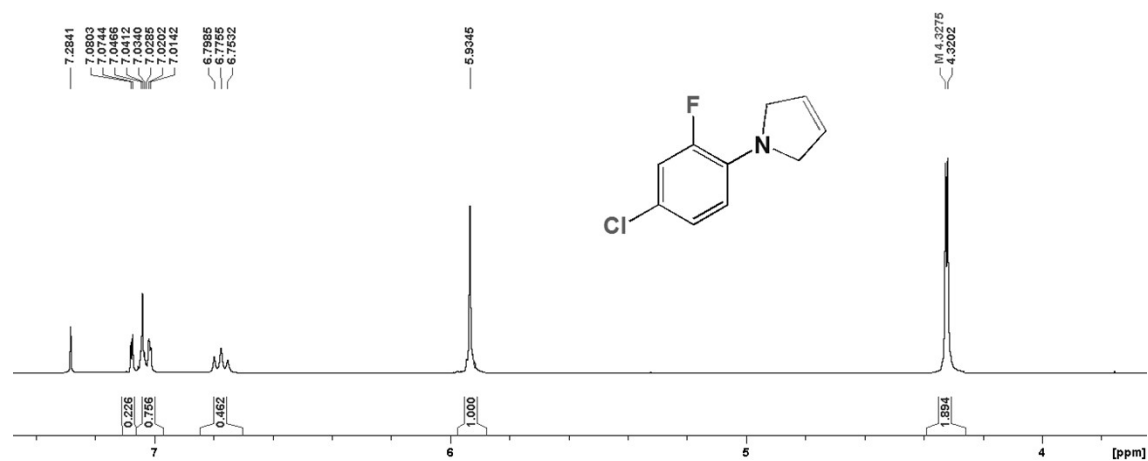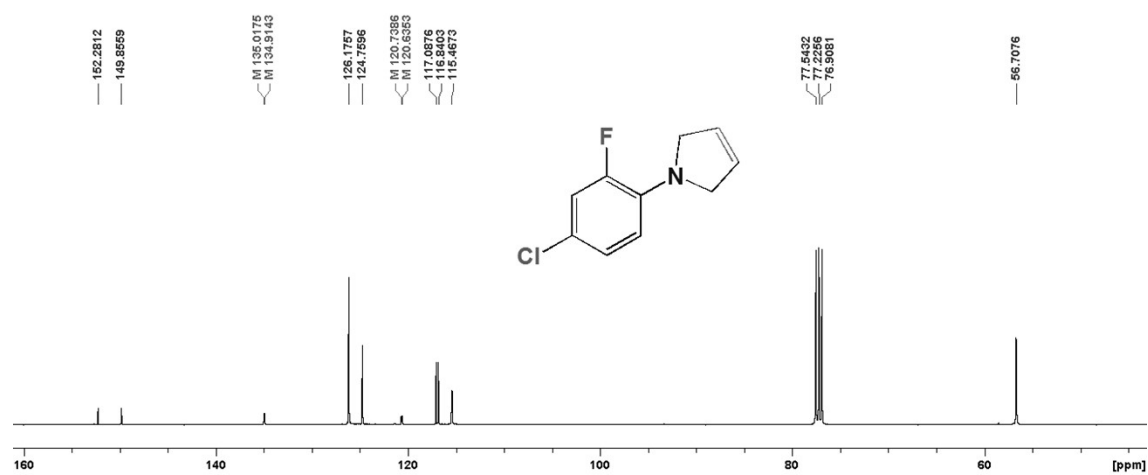

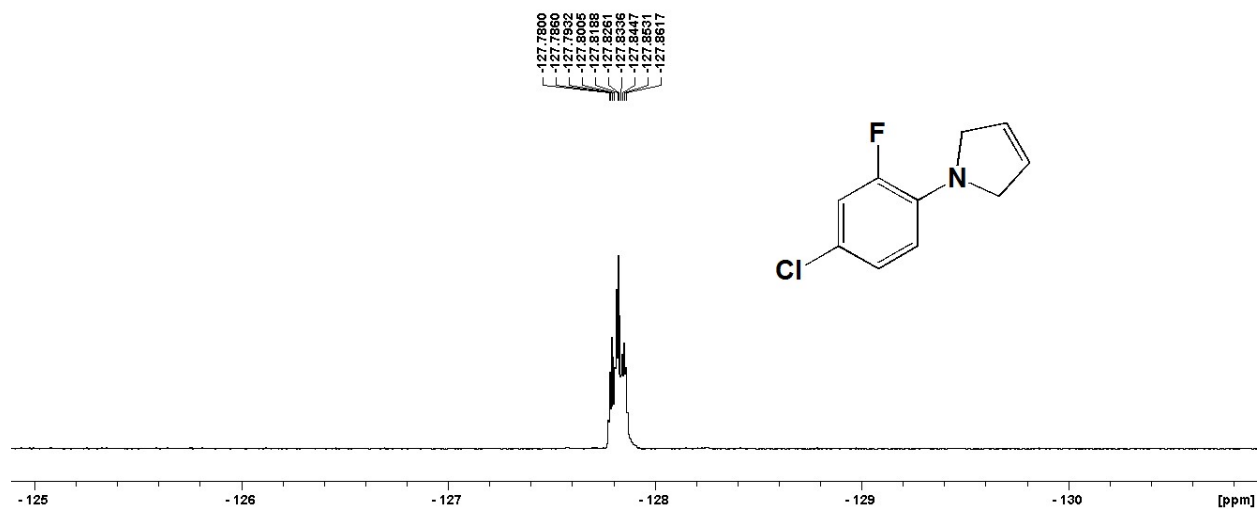

Figure S39.  $^{19}\text{F}$  NMR spectrum of **9q** in  $\text{CDCl}_3$  at  $25\text{ }^\circ\text{C}$ .

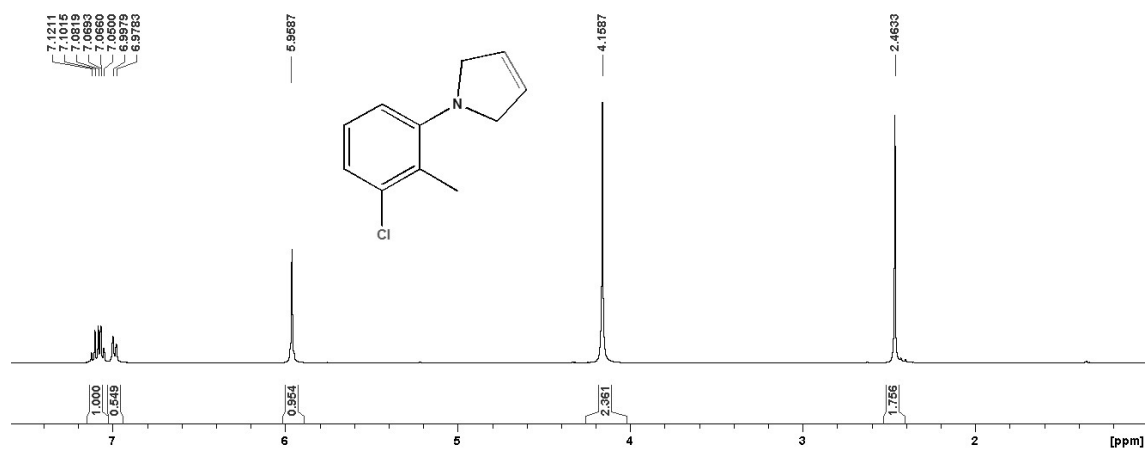

Figure S40.  $^1\text{H}$ -NMR spectrum of **9r** in  $\text{CDCl}_3$  at  $25\text{ }^\circ\text{C}$ .

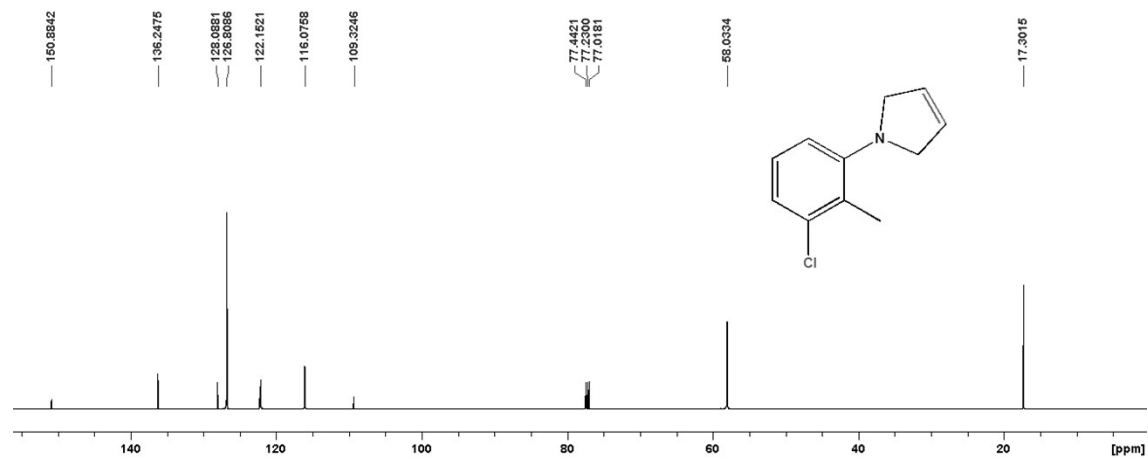

Figure S41.  $^{13}\text{C}$ -NMR spectrum of **9r** in  $\text{CDCl}_3$  at  $25\text{ }^\circ\text{C}$ .

### Mass spectra

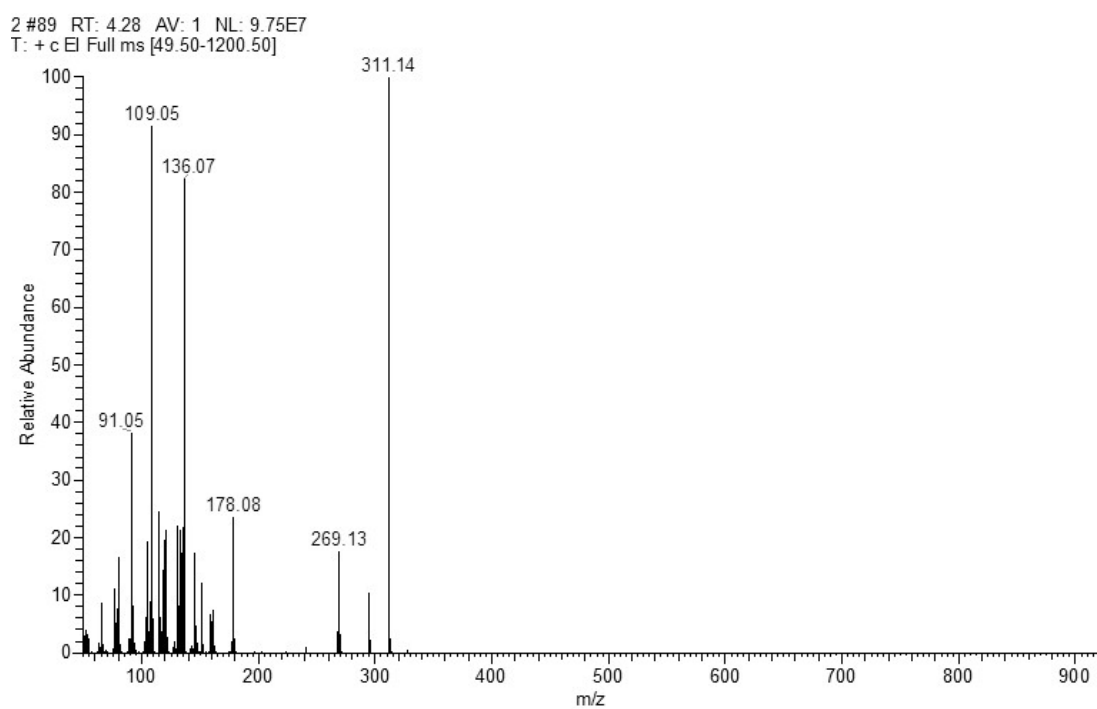

Figure S42. EI spectrum of **6a**.

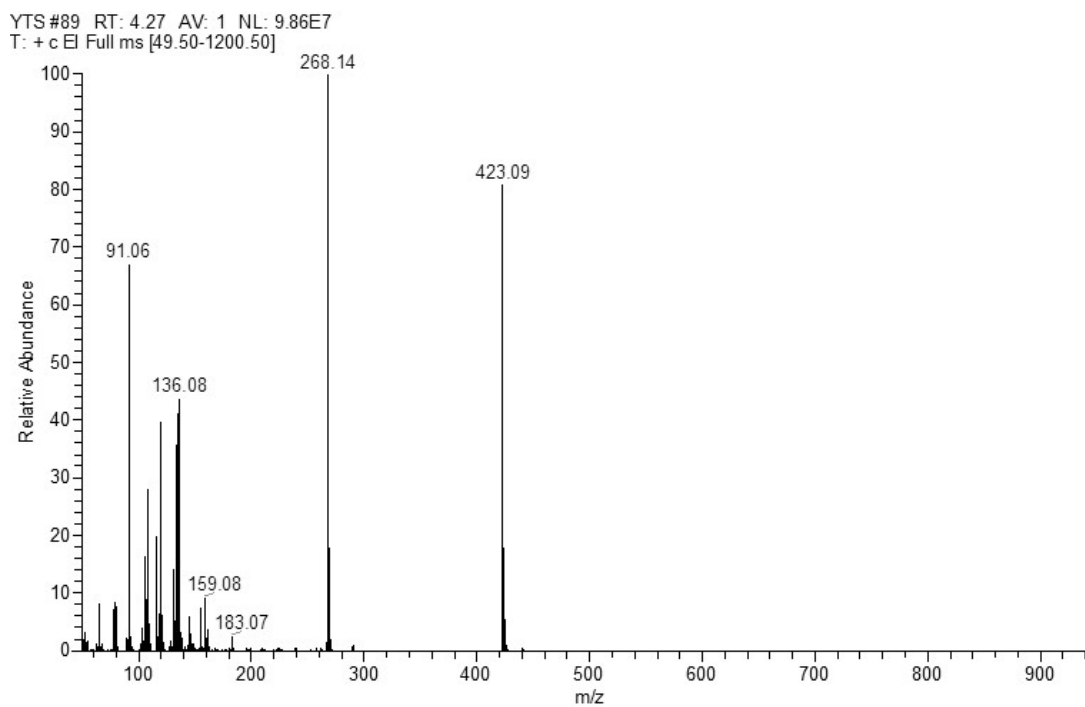

Figure S43. EI spectrum of 6b.

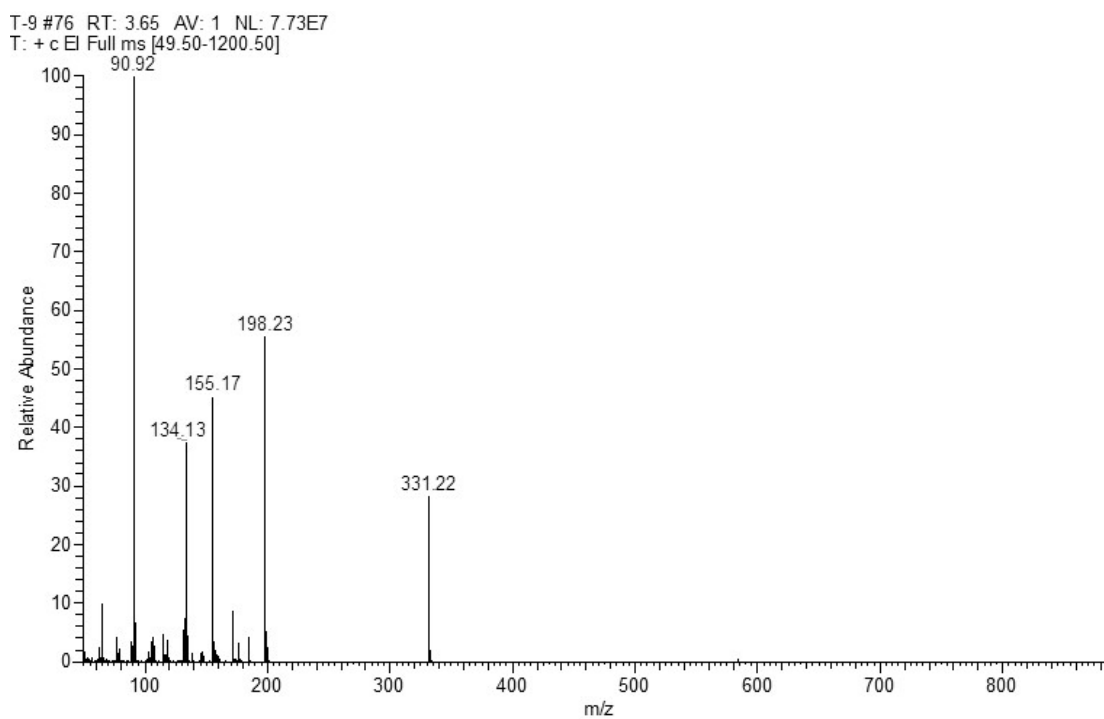

Figure S44. EI spectrum of 6c.

PLC #193 RT: 8.59 AV: 1 NL: 3.72E7  
T: + c EI Full ms [49.50-1000.50]

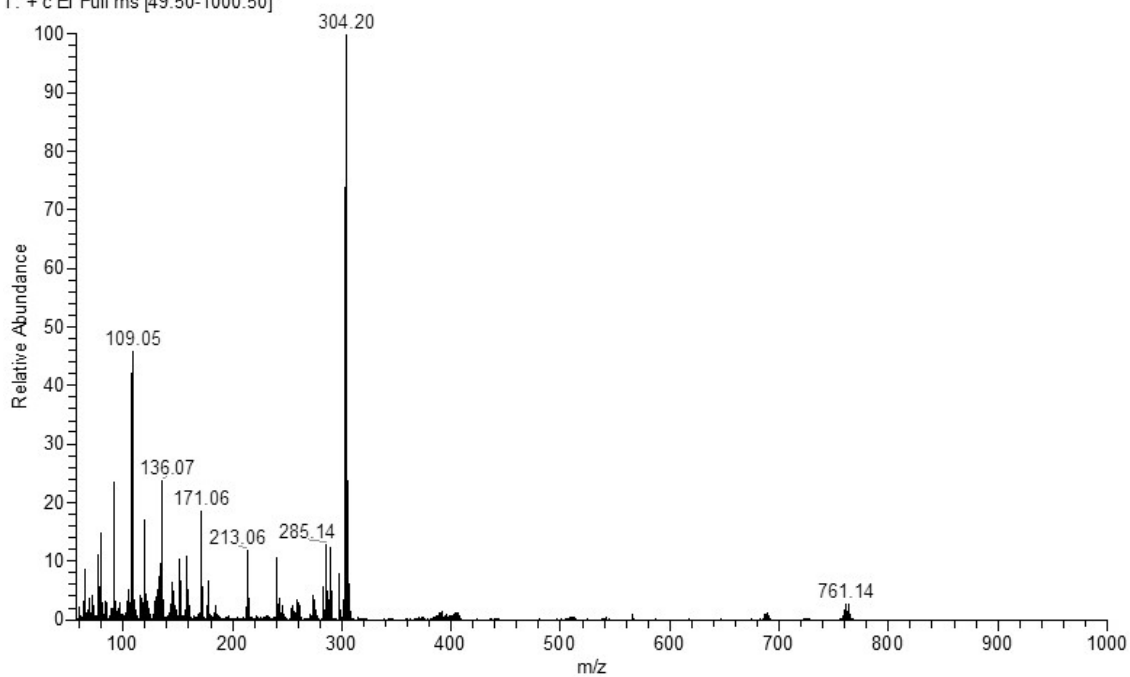

Figure S45. EI spectrum of 7a.

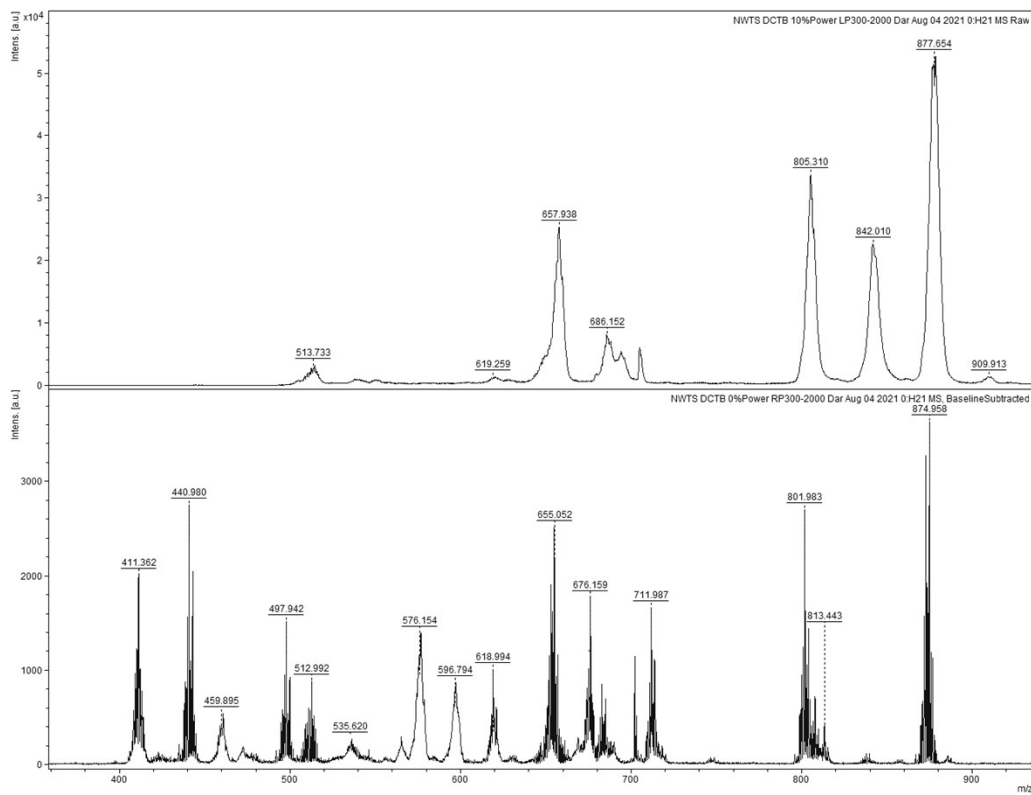

Figure S46. MALDI-MS spectrum of 7b.



BG FAB-782-re #16-20 RT: 0.67-0.84 AV: 5 NL: 2.49E6  
T: + c FAB Full ms [49.50-900.50]

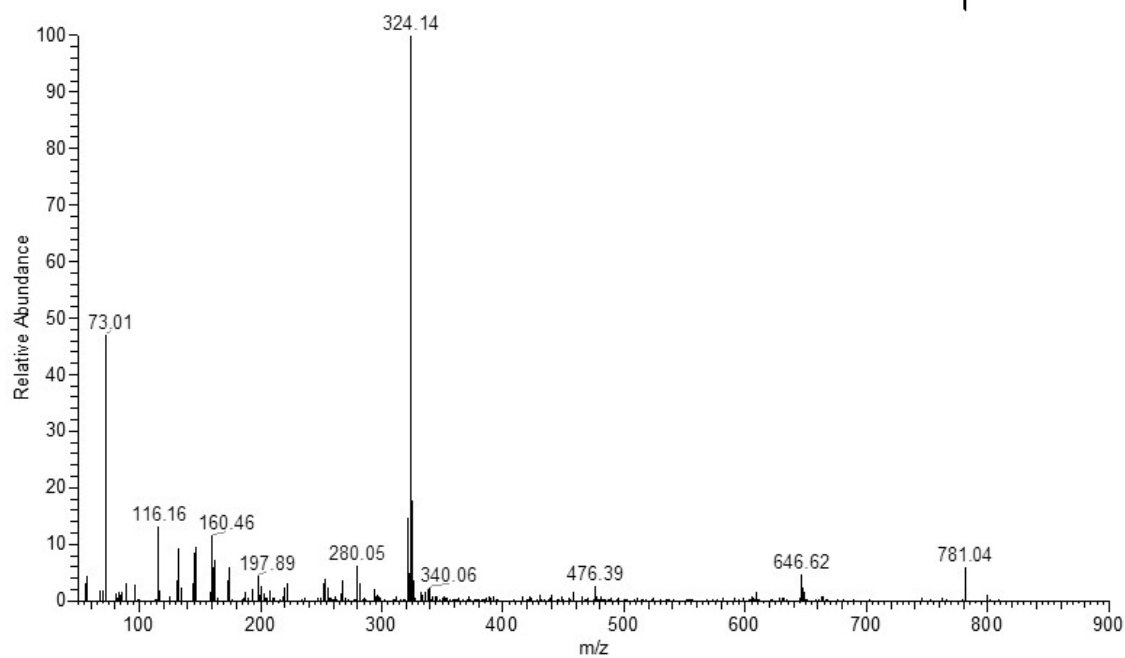

Figure S47. FAB-MS spectrum of 7c.

2-3diMe #11 RT: 0.49 AV: 1 NL: 9.66E7  
T: + c EI Full ms [49.50-1200.50]

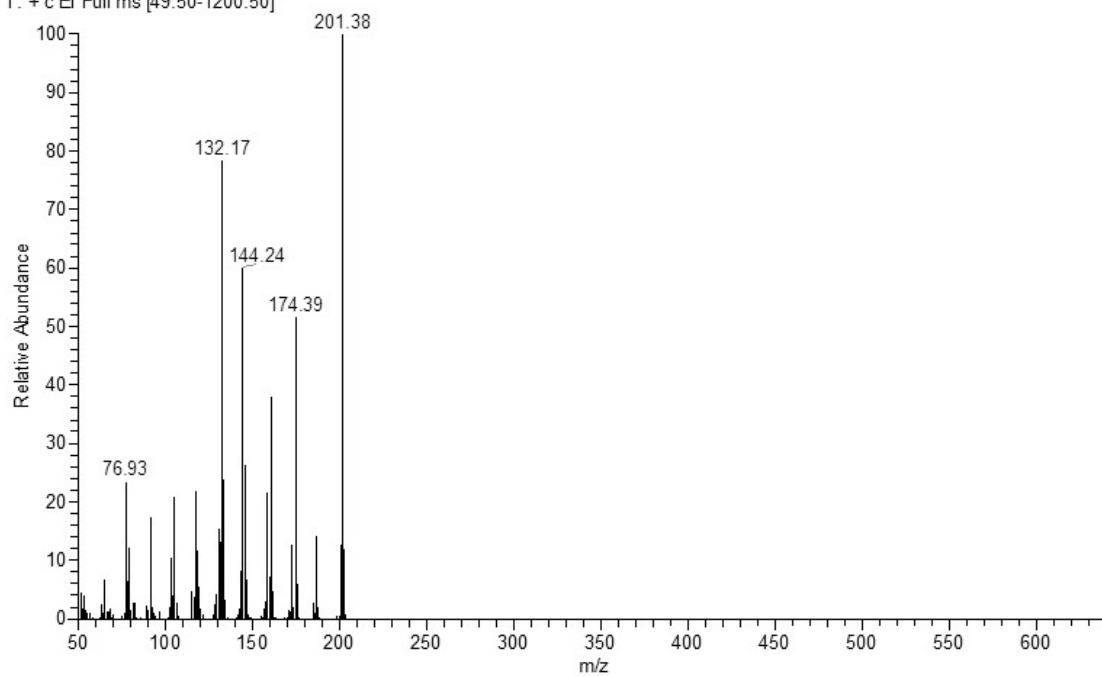

Figure S48. EI spectrum of 8i.

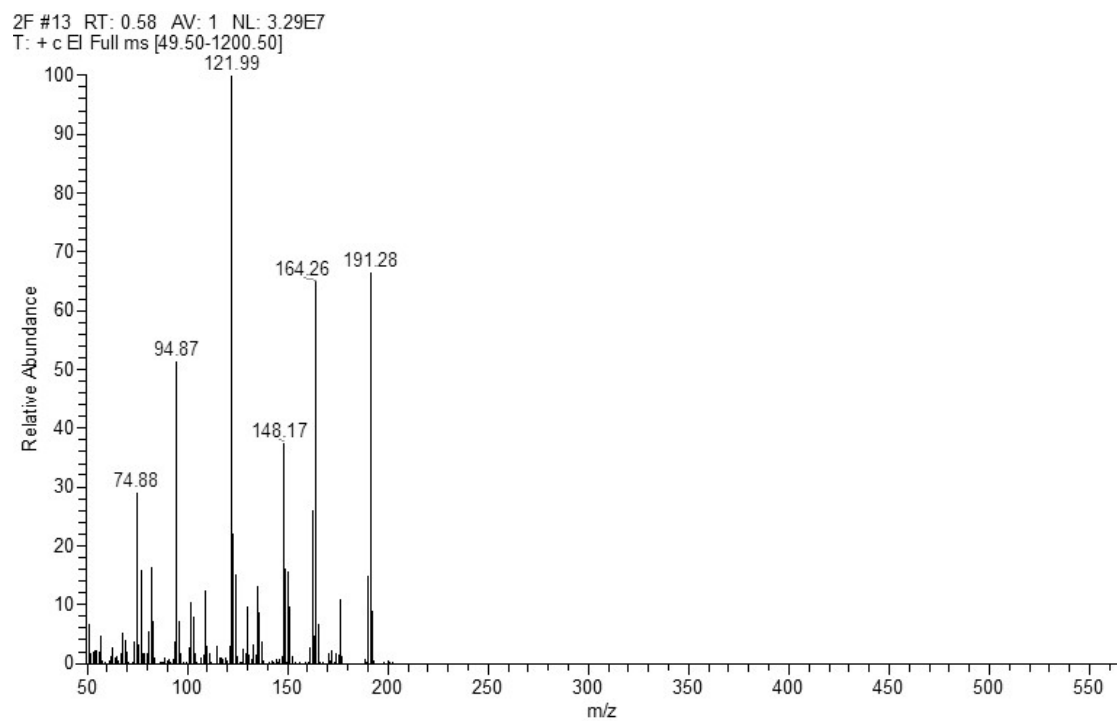

Figure S49. EI spectrum of 8k.

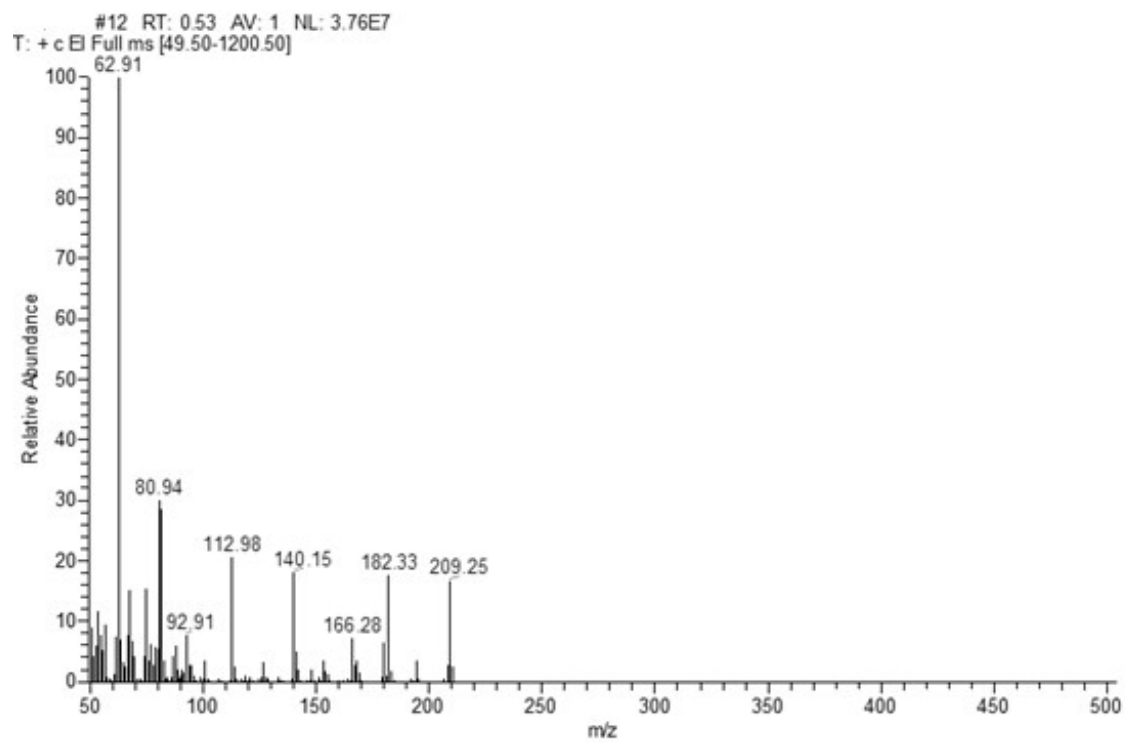

Figure S50. EI spectrum of 8o.

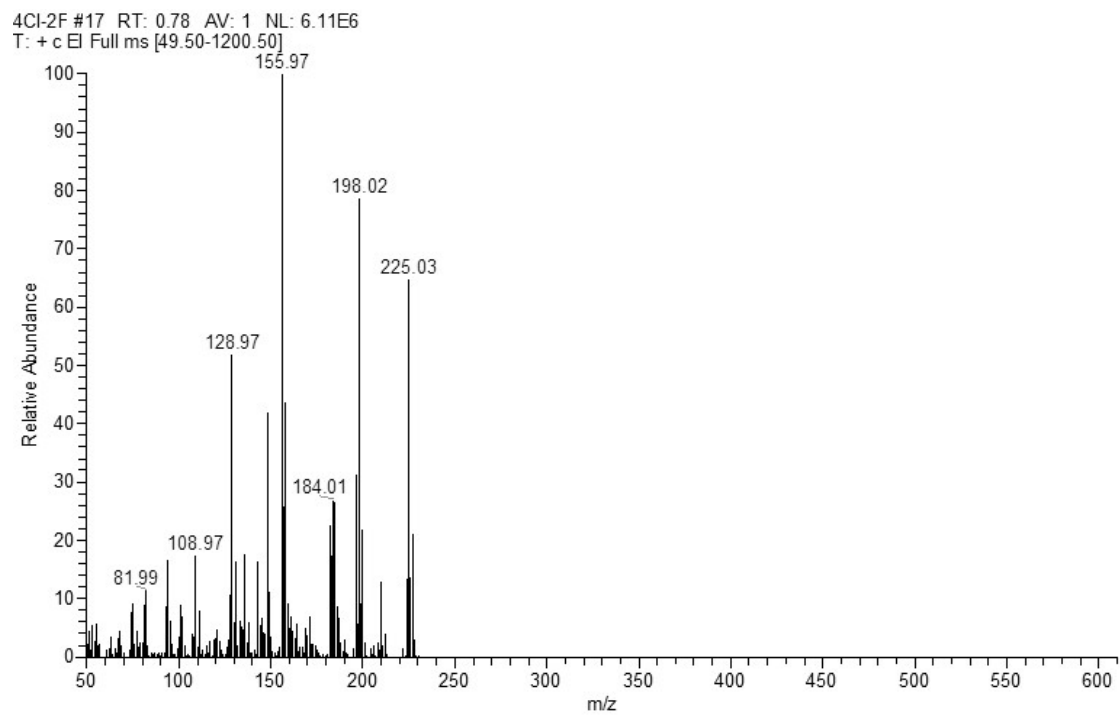

Figure S51. EI spectrum of 8q.

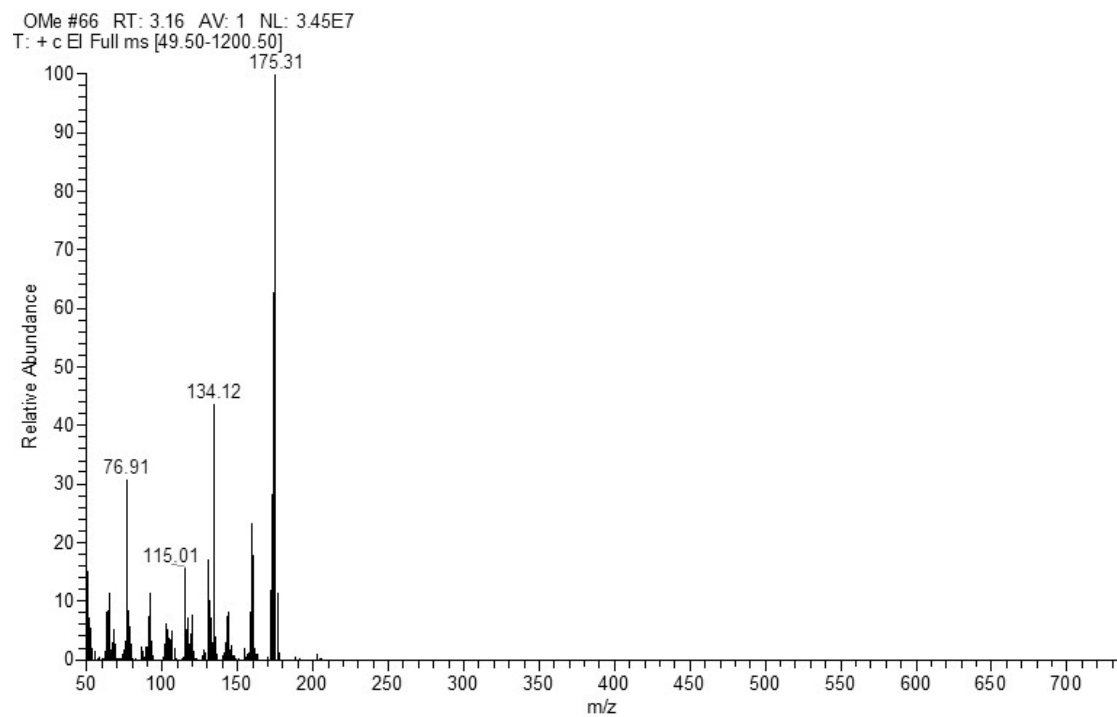

Figure S52. EI spectrum of 9f.

2.3M1 #21 RT: 0.97 AV: 1 NL: 4.87E7  
T: + c EI Full ms [49.50-1200.50]

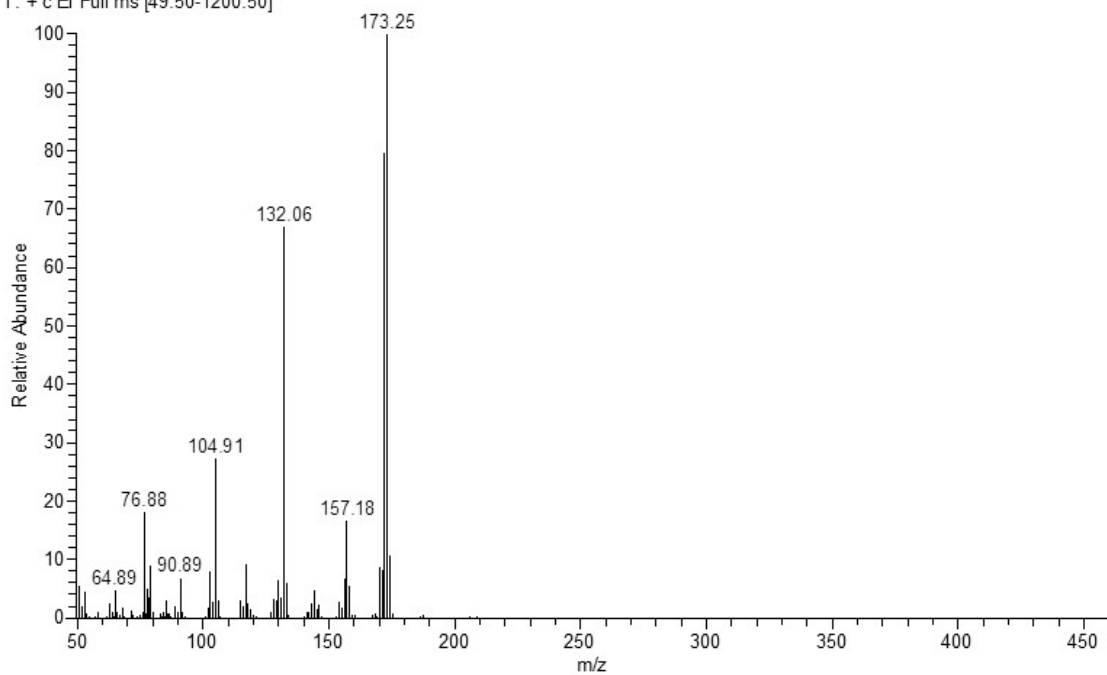

Figure S53. EI spectrum of 9i.

3.5-pdtVpure #12 RT: 0.54 AV: 1 NL: 6.64E6  
T: + c EI Full ms [49.50-1200.50]

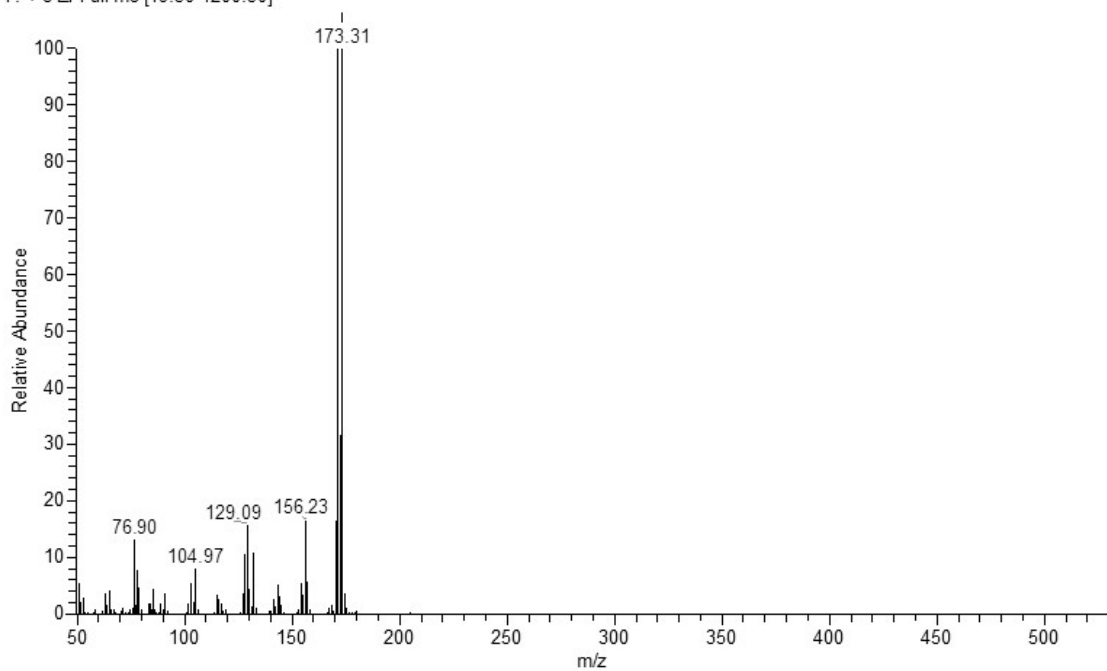

Figure S54. EI spectrum of 9j.

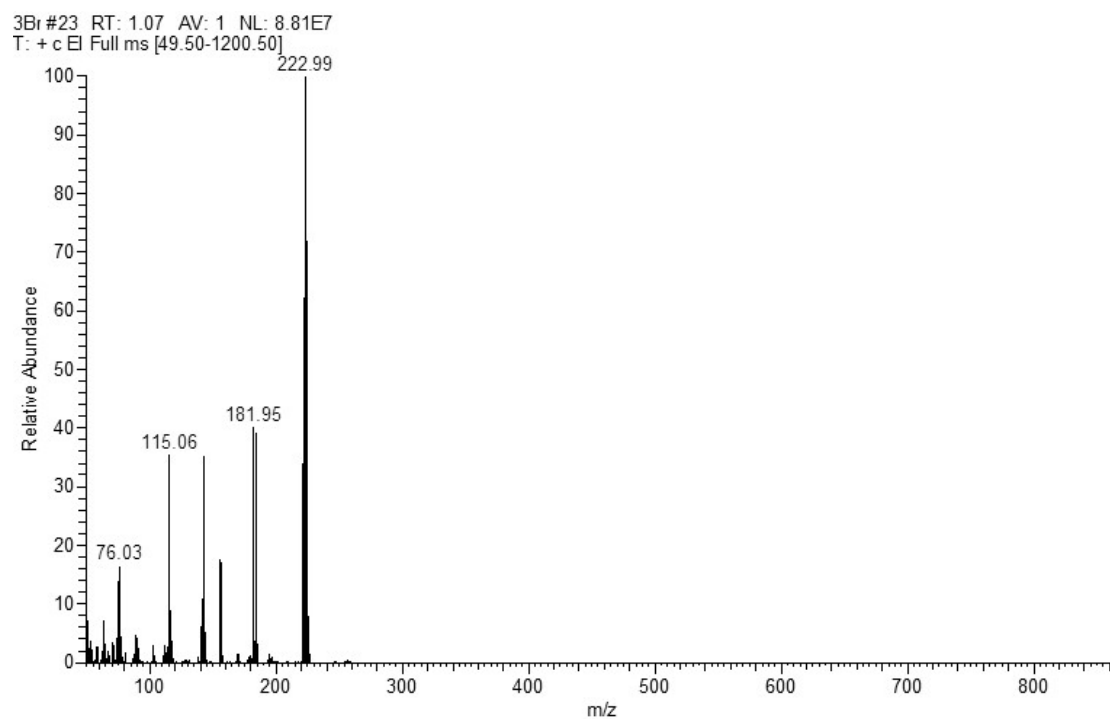

Figure S55. EI spectrum of 9l.

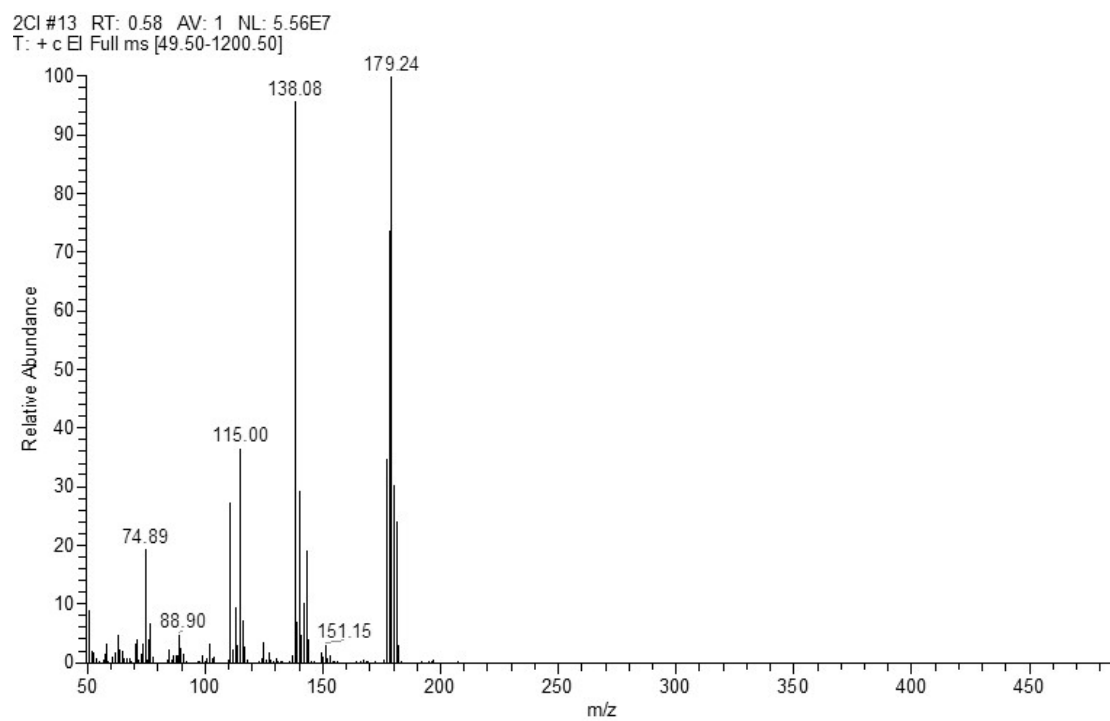

Figure S56. EI spectrum of 9m.

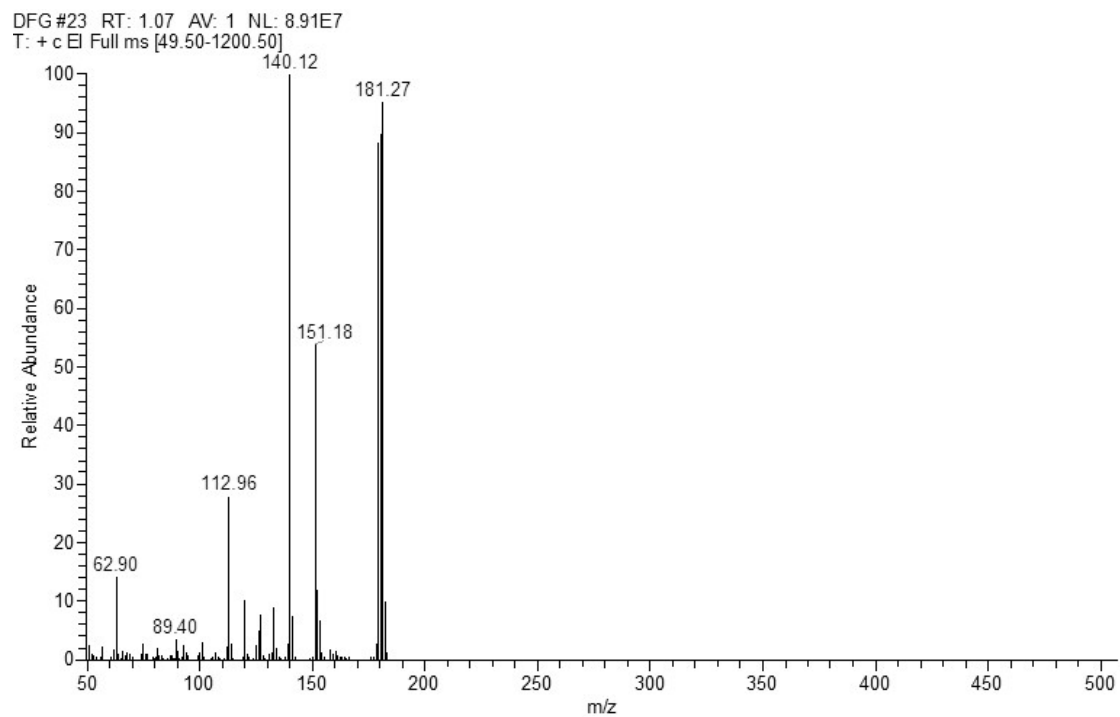

Figure S57. EI spectrum of 9o.

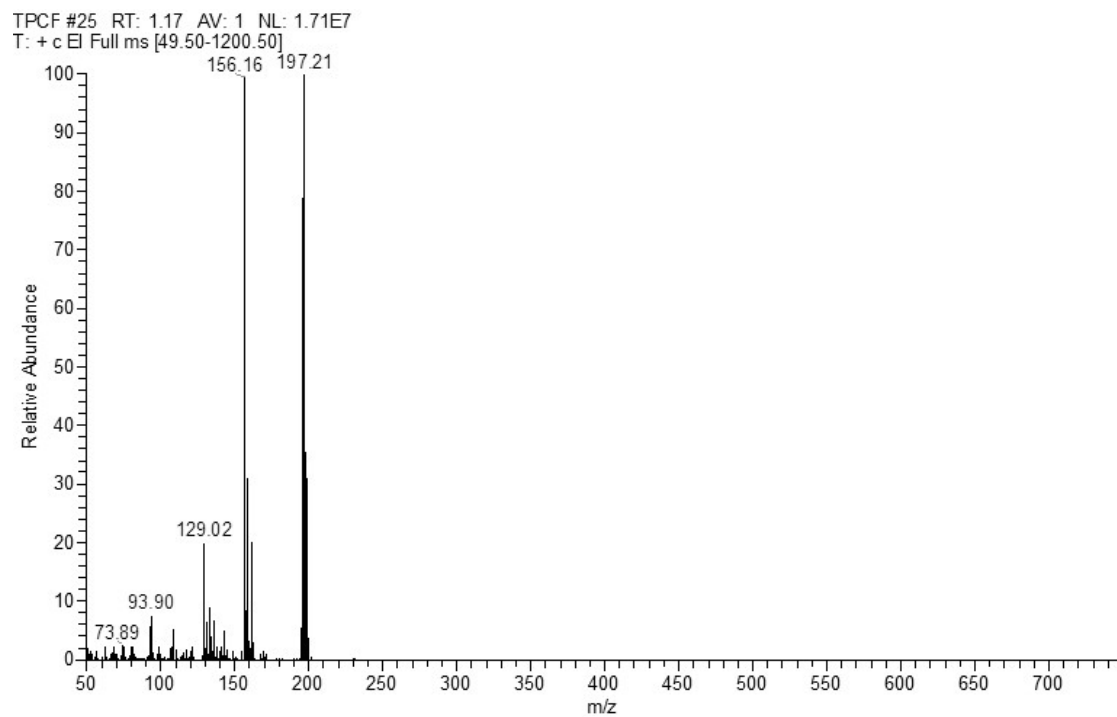

Figure S58. EI spectrum of 9q.

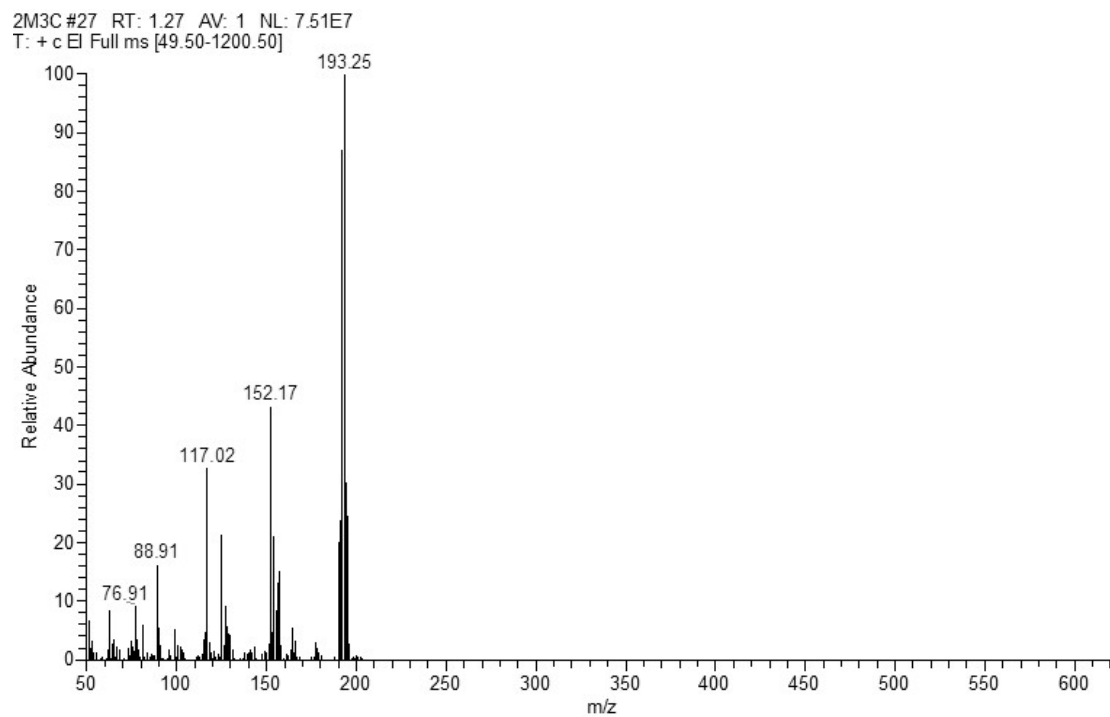

Figure S59. EI spectrum of 9r.

### Deconvoluted HRMS (ESI)

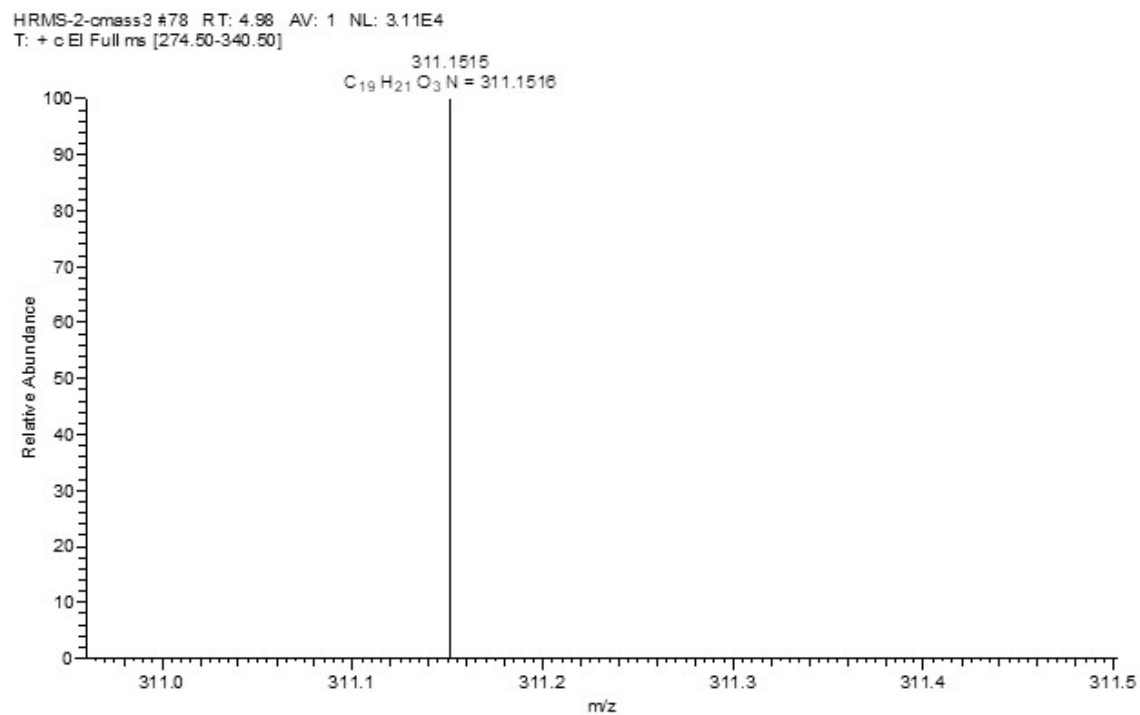

**Figure S60. HRMS spectrum of 6a.**

HRMS-4TS-cmass1 #15 RT: 4.53 AV: 1 NL: 2.27E4  
T: + c EI Full ms [389.50-450.50]

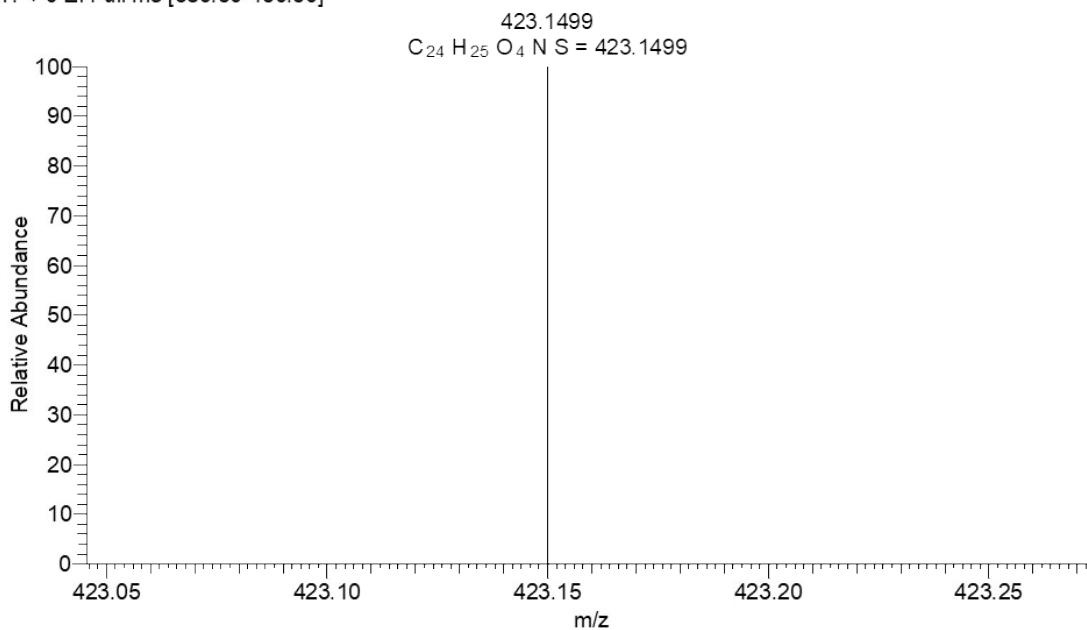

**Figure S61. HRMS spectrum of 6b.**

HRMS-T9-cmass1 #6 RT: 3.37 AV: 1 NL: 2.51E4  
T: + c EI Full ms [299.50-360.50]

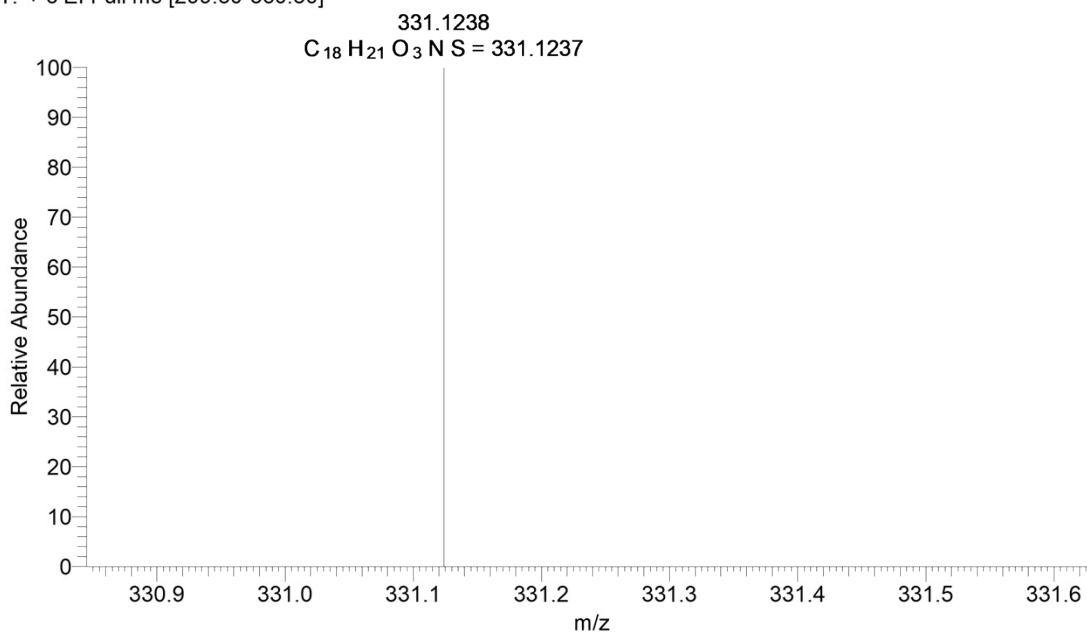

**Figure S62. HRMS spectrum of 6c.**



HRMS-PLC-c1 #31 RT: 7.57 AV: 1 NL: 1.79E3  
T: + c EI Full ms [739.50-800.50]

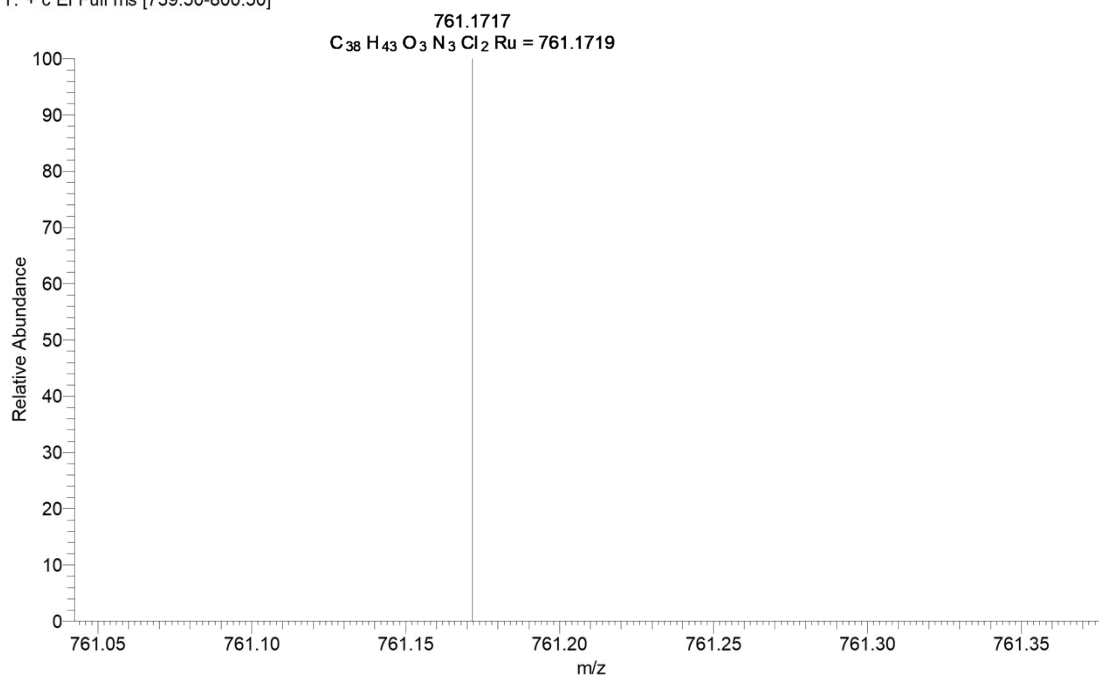

**Figure S63.** HRMS spectrum of **7a**.

HRMS-TS2-cmass2 #175 RT: 10.18 AV: 1 NL: 1.44E2  
T: + c EI Full ms [719.50-820.50]

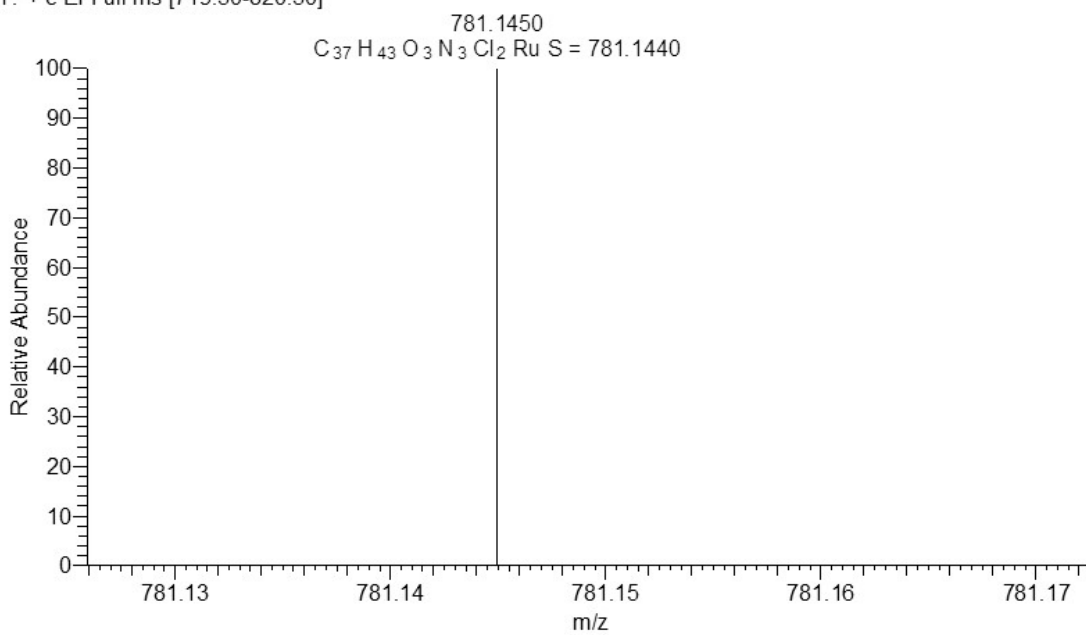

**Figure S64.** HRMS spectrum of **7c**.

HRMS-2,3Dime-cmass1 #25-27 RT: 1.55-1.67 AV: 3 NL: 1.51E5  
T: + c EI Full ms [169.50-220.50]

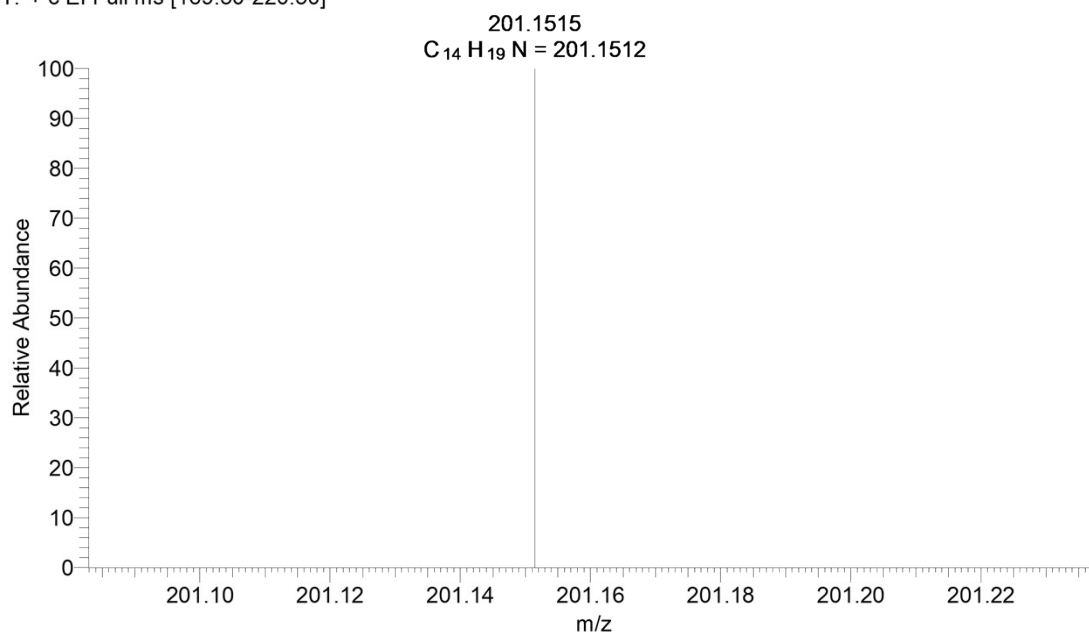

**Figure S65.** HRMS spectrum of **8i**.

HRMS-2F\_210802123320-cmass1 #19-22 RT: 1.76-1.98 AV: 4 NL: 2.25E4  
T: + c EI Full ms [159.50-220.50]

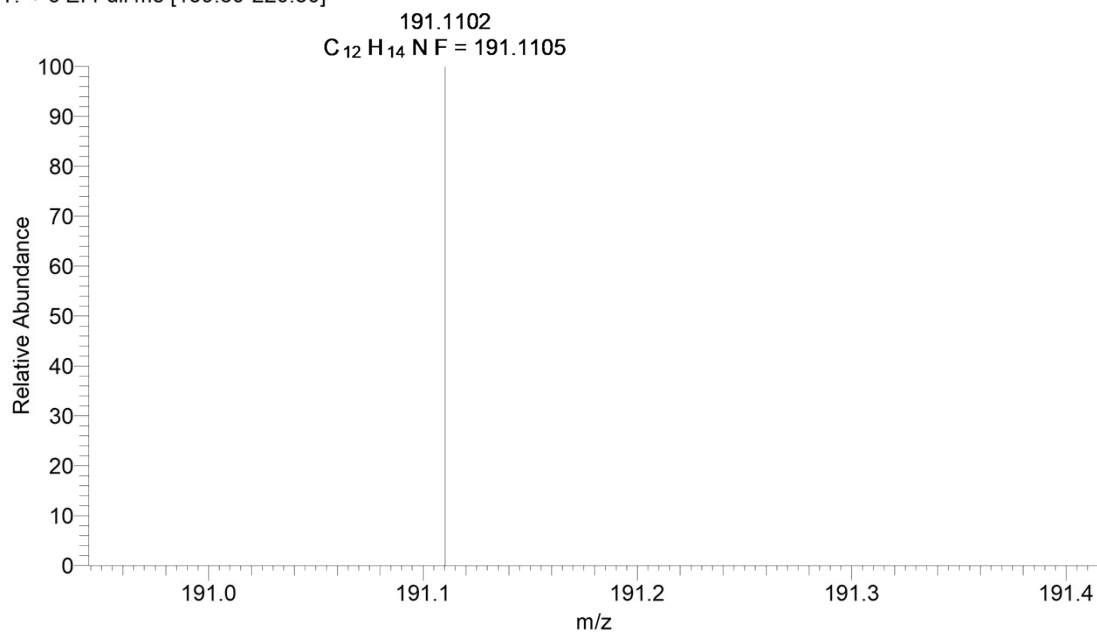

**Figure S66.** HRMS spectrum of **8k**.

HRMS-24F-cmass1 #10-12 RT: 0.75-0.89 AV: 3 NL: 4.38E5  
T: + c EI Full ms [169.50-235.50]

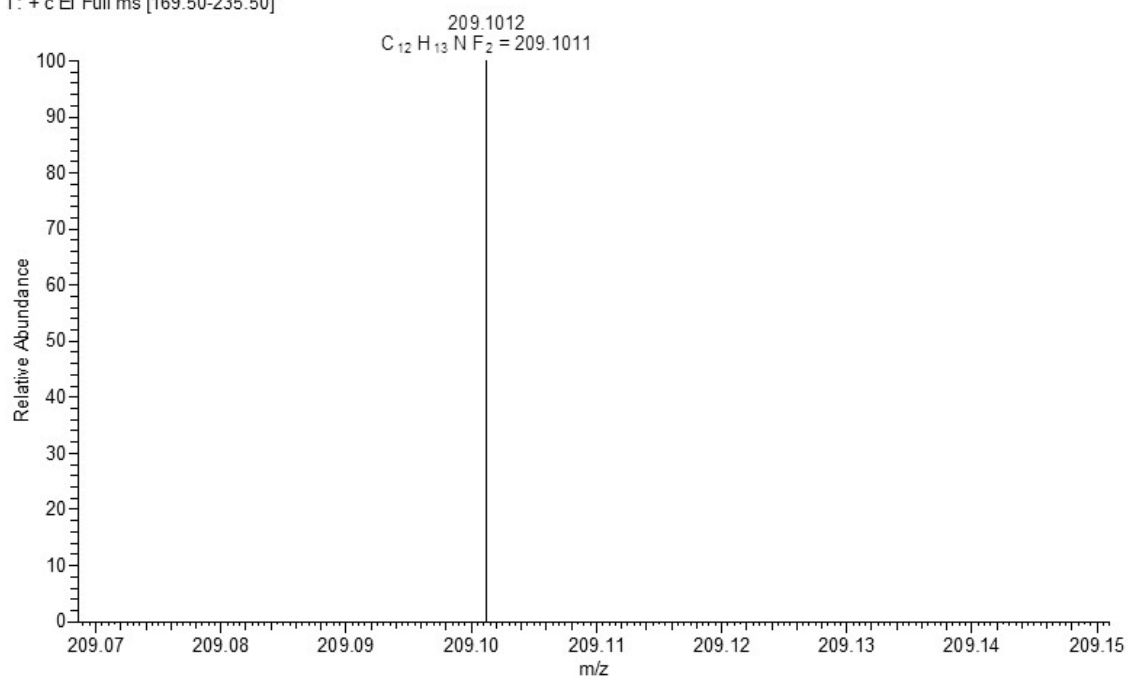

**Figure S67.** HRMS spectrum of **8o**.

HRMS-4C2Fst-cmass1 #26 RT: 2.03 AV: 1 NL: 4.31E5  
T: + c EI Full ms [189.50-250.50]

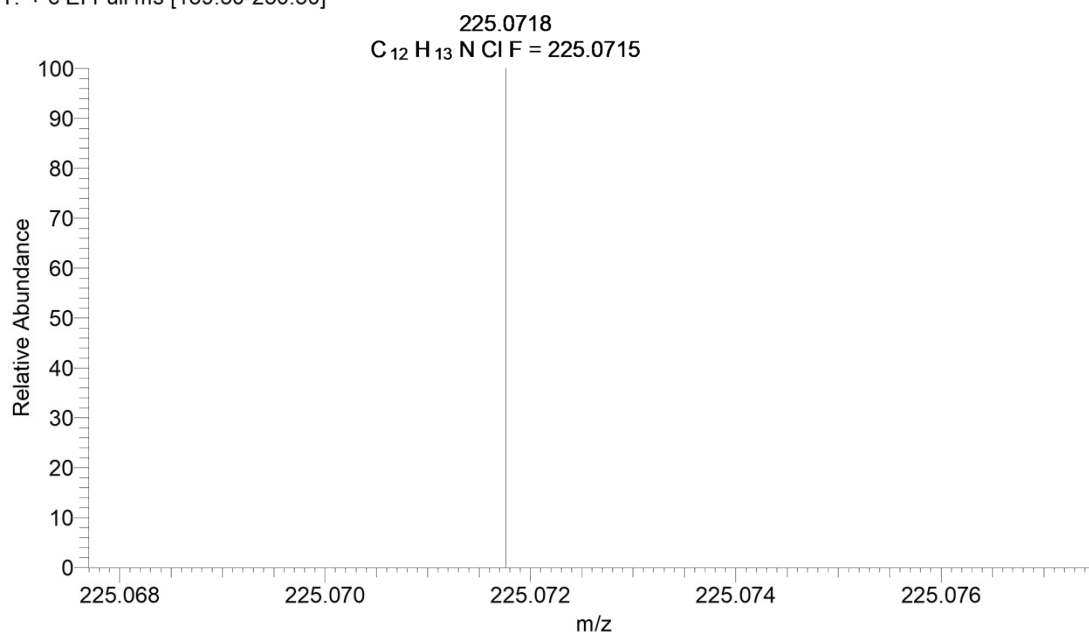

**Figure S68.** HRMS spectrum of **8q**.

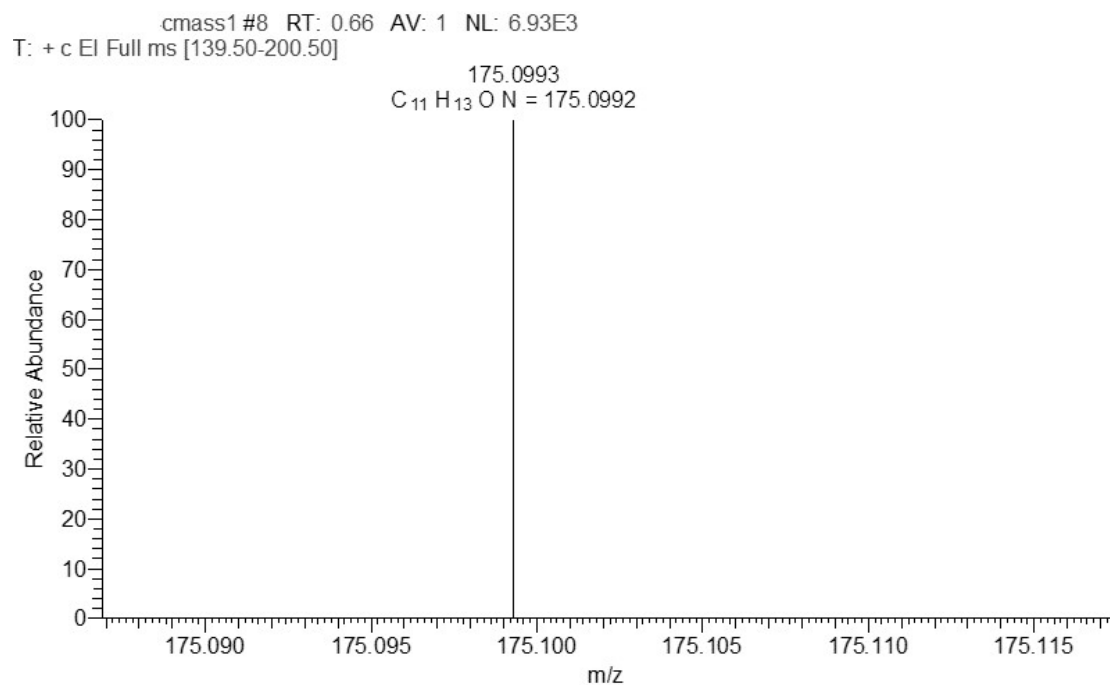

**Figure S69.** HRMS spectrum of **9f**.

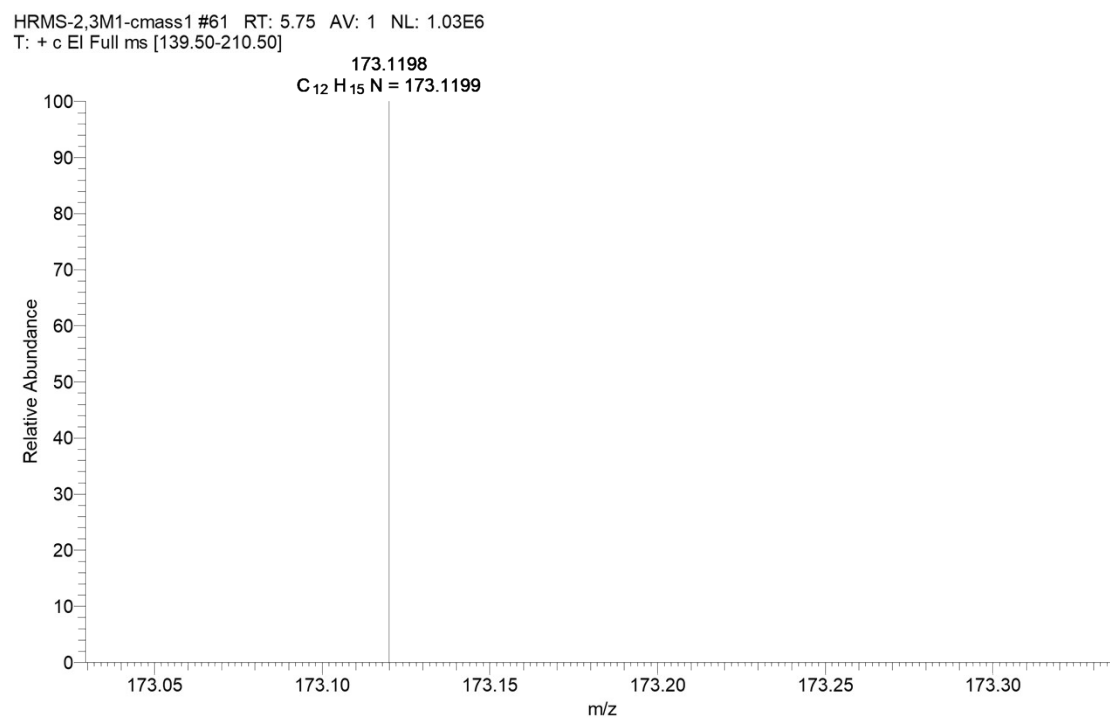

**Figure S70.** HRMS spectrum of **9i**.

HRMS-3,5pdt-cmass1 #61 RT: 5.75 AV: 1 NL: 1.03E6  
T: + c EI Full ms [139.50-210.50]

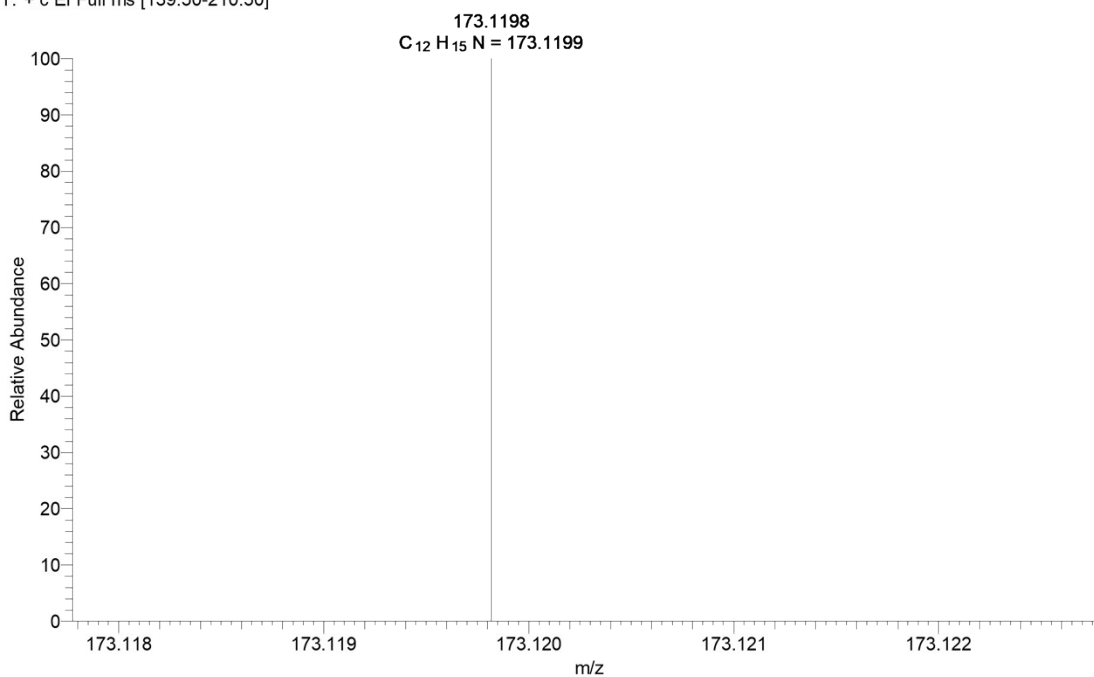

**Figure S71.** HRMS spectrum of **9j**.

HRMS-3Brpdt-cmass1 #61-62 RT: 4.48-4.55 AV: 2 NL: 4.91E4  
T: + c EI Full ms [189.50-260.50]

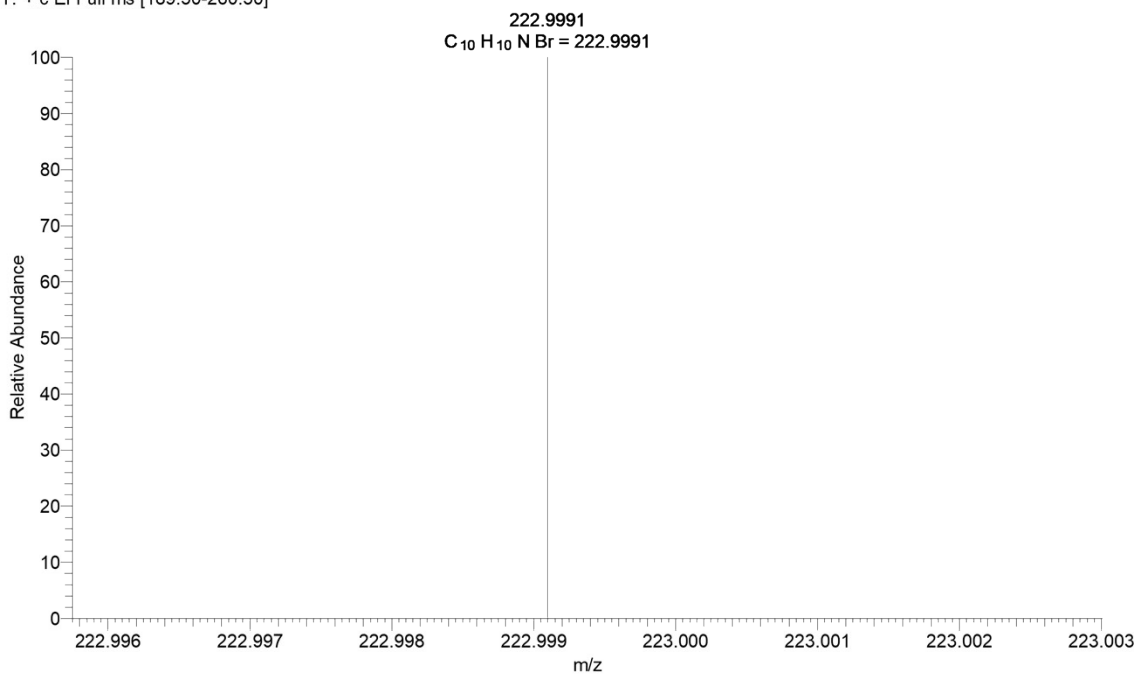

**Figure S72.** HRMS spectrum of **9i**.

HRMS-2ClPdt-cmass1 #21 RT: 2.23 AV: 1 NL: 1.34E6  
T: + c EI Full ms [139.50-210.50]

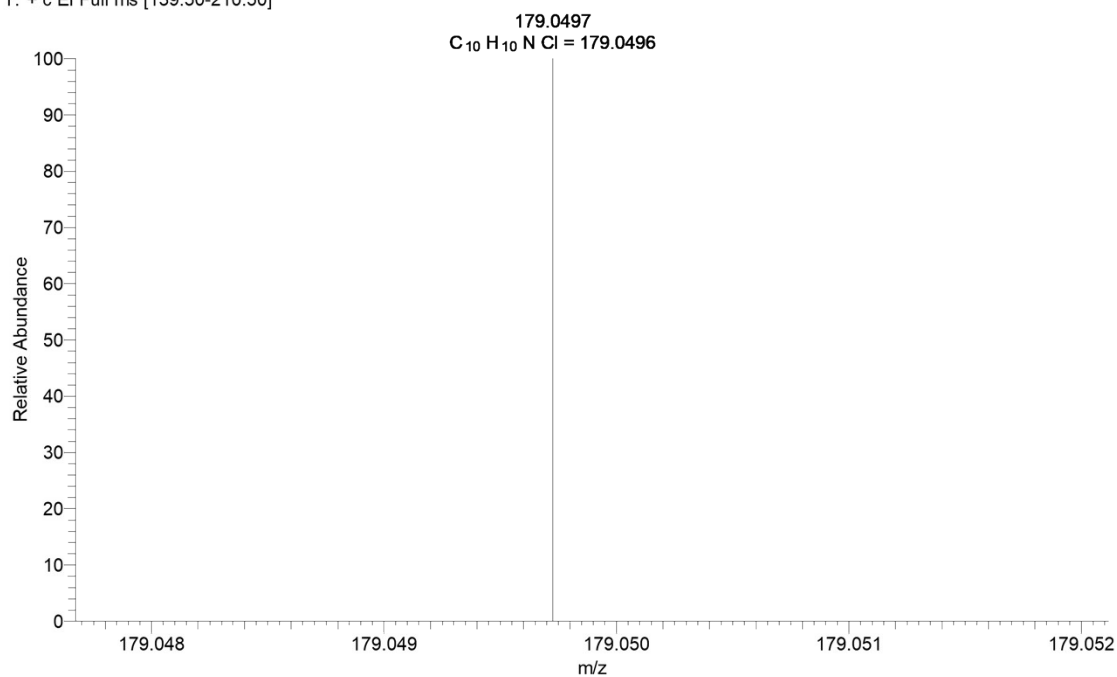

**Figure S73.** HRMS spectrum of **9m**.

HRMS-DFG-cmass1 #119 RT: 10.35 AV: 1 NL: 5.25E3  
T: + c EI Full ms [149.50-220.50]

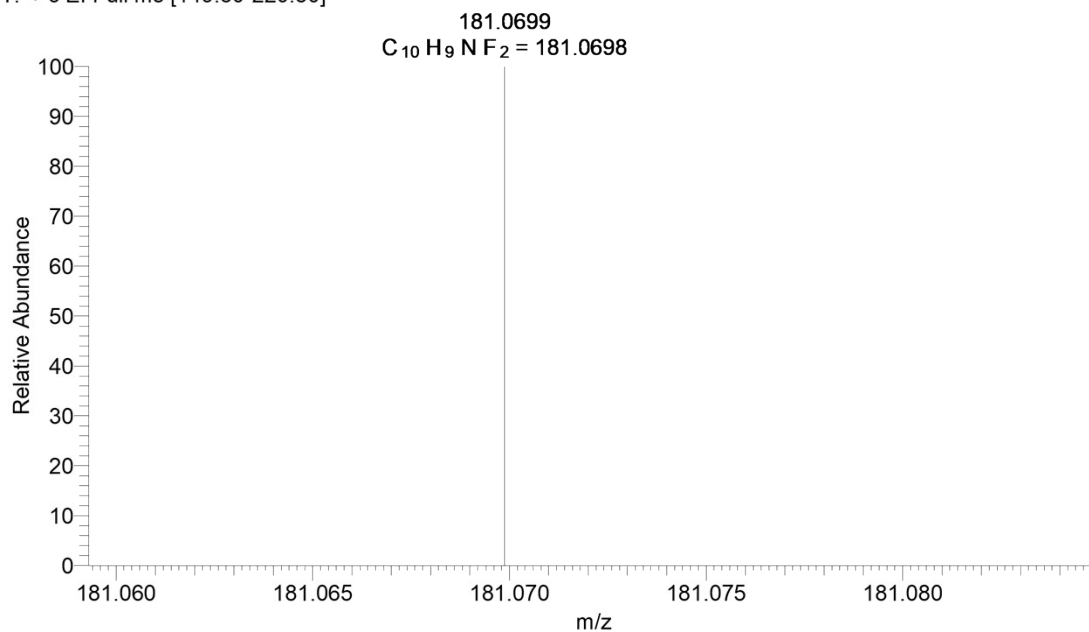

**Figure S74.** HRMS spectrum of **9o**.

HRMS-4C2F-cmass1 #29 RT: 2.05 AV: 1 NL: 1.26E5  
T: + c EI Full ms [159.50-220.50]

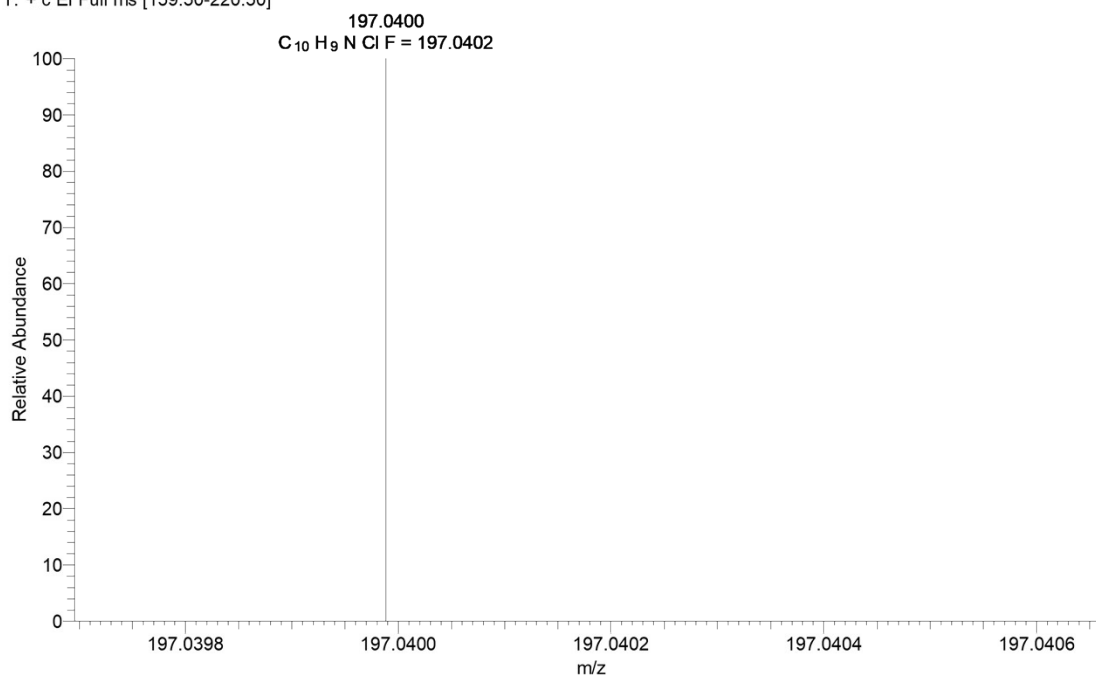

**Figure S70.** HRMS spectrum of **9q**.

HRMS-2M3C-cmass1 #72-88 RT: 5.42-6.59 AV: 17 NL: 4.18E5  
T: + c EI Full ms [159.50-220.50]

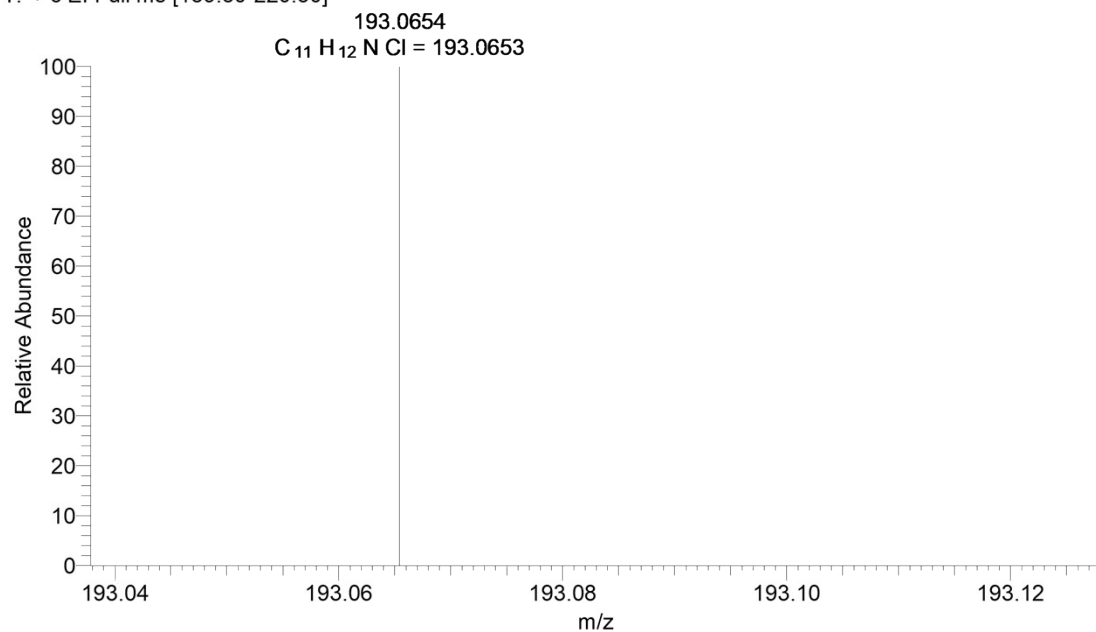

**Figure S71.** HRMS spectrum of **9r**.

### Single Crystal X-ray diffraction study of the Ru complexes **7a**, **7b** & **7c**

Single crystals of **7a**, **7b** & **7c** were grown by solvent diffusion method. The single crystal data collection of **7a** and **7c** were made on Bruker X8 prospector diffractometer by Cu-K $\alpha$ . The reflection frames were then integrated with the Bruker SAINT Software package using a narrow-frame algorithm; the structures were solved using the Bruker SHELXTL Software Package. The single crystal data collection of **7b** was made on Rigaku Rapid II diffractometer by Mo-K $\alpha$ . This structure was then solved by 'crystalstructure' software package. Finally, all structures were refined using SHELXL-2017/1. All non-hydrogen atoms were refined anisotropically and hydrogen atoms were refined using the riding model. The crystal structures (thermal ellipsoid representation) of **7a**, **7b** & **7c** are given in **Figure S72-S74** and their various crystallographic data including crystal nature, data collection strategy and refinement parameters are summarized in the **Table S1**.

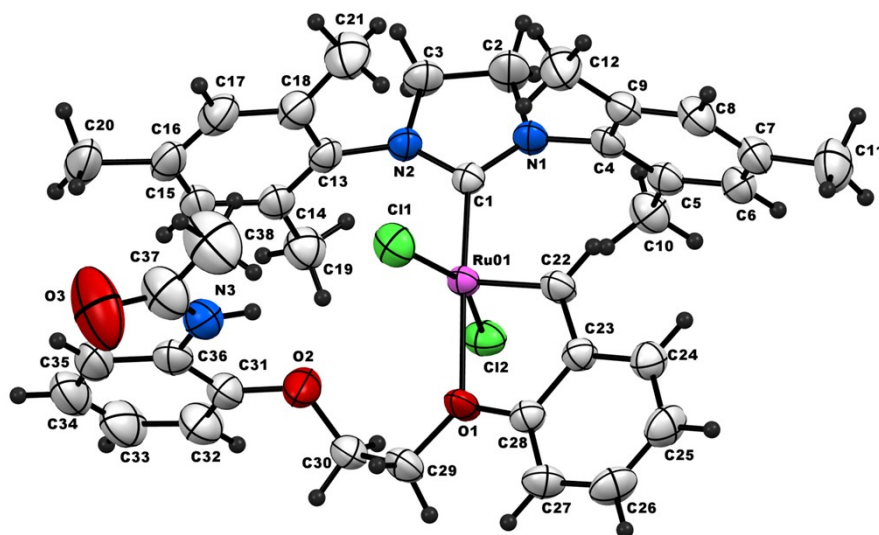

**Figure S72.** crystal structure (thermal ellipsoid representation; 50% probability) of **7a**.



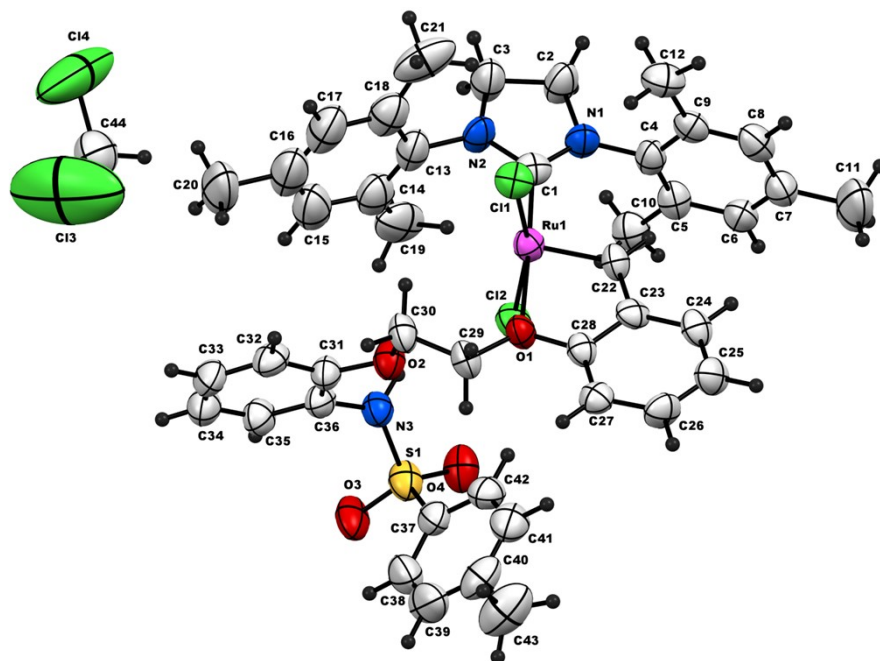

Figure S73. crystal structure (thermal ellipsoid representation; 50% probability) of 7b.

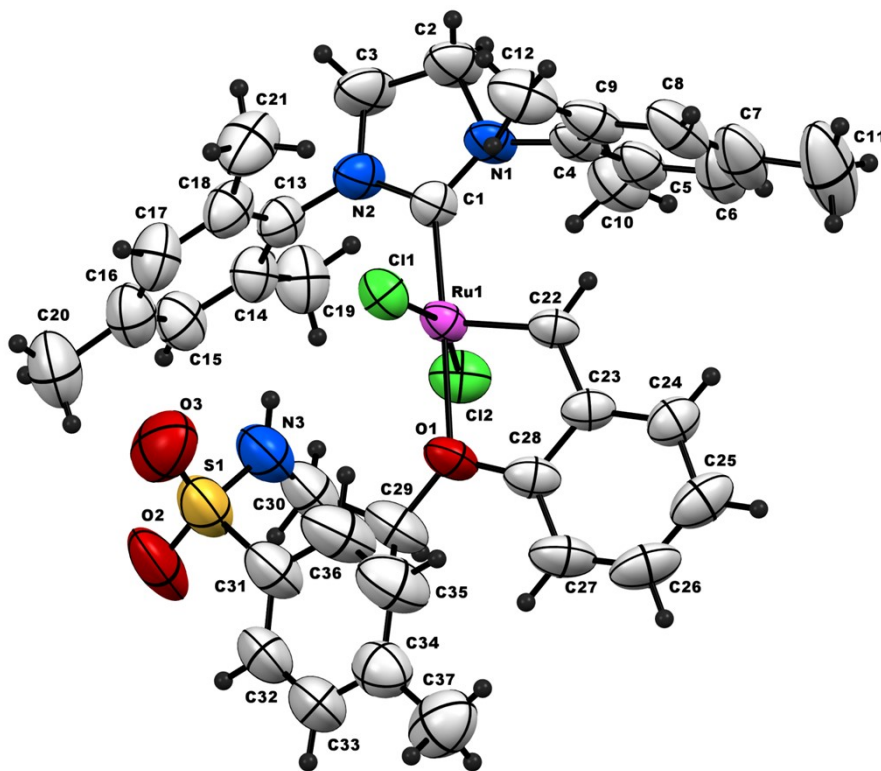

Figure S74. crystal structure (thermal ellipsoid representation; 50% probability) of 7c.

**Table S1.** Summary on the nature and various crystallographic parameters of **7a**, **7b** & **7c**.

| Crystal sample                                                              | 7a                                                                               | 7b                                                                                | 7c                                                                                 |
|-----------------------------------------------------------------------------|----------------------------------------------------------------------------------|-----------------------------------------------------------------------------------|------------------------------------------------------------------------------------|
| Chemical formula                                                            | C <sub>38</sub> H <sub>43</sub> Cl <sub>2</sub> N <sub>3</sub> O <sub>3</sub> Ru | C <sub>44</sub> H <sub>49</sub> Cl <sub>4</sub> N <sub>3</sub> O <sub>4</sub> RuS | C <sub>37</sub> H <sub>43</sub> Cl <sub>2</sub> N <sub>3</sub> O <sub>3</sub> RuS  |
| $M_r$                                                                       | 761.72                                                                           | 958.79                                                                            | 781.77                                                                             |
| Crystal system, space group                                                 | Triclinic, <i>P</i> -1                                                           | Monoclinic, <i>P</i> <sub>2</sub> <sub>1</sub> / <i>c</i>                         | Trigonal, <i>R</i> -3 :H                                                           |
| Temperature (K)                                                             | 296                                                                              | 150                                                                               | 150                                                                                |
| $a, b, c$ (Å)                                                               | 8.8611 (4), 10.6837 (5),<br>19.3949 (10)                                         | 12.038 (10), 14.886 (12),<br>24.180 (19)                                          | 28.6420 (5), 24.4463 (9)                                                           |
| $\alpha, \beta, \gamma$ (°)                                                 | 74.511 (2), 87.898 (2), 89.558<br>(2)                                            | 90, 91.36 (3), 90                                                                 | 90, 90, 120                                                                        |
| $V$ (Å <sup>3</sup> )                                                       | 1768.22 (15)                                                                     | 4332 (6)                                                                          | 17368.0 (9)                                                                        |
| $Z$                                                                         | 2                                                                                | 4                                                                                 | 18                                                                                 |
| Radiation type                                                              | Cu $K\alpha$                                                                     | Mo $K\alpha$                                                                      | Cu $K\alpha$                                                                       |
| $\mu$ (mm <sup>-1</sup> )                                                   | 5.30                                                                             | 0.70                                                                              | 5.36                                                                               |
| Crystal size (mm)                                                           | 0.21 × 0.20 × 0.08                                                               | 0.10 × 0.05 × 0.04                                                                | 0.18 × 0.14 × 0.12                                                                 |
| Diffractometer                                                              | Bruker APEX-II CCD                                                               | Rigaku R-AXIS RAPID                                                               | Bruker APEX-II CCD                                                                 |
| Absorption correction                                                       | Multi-scan                                                                       | Multi-scan                                                                        | Multi-scan                                                                         |
|                                                                             | SADABS2016/2 - Bruker AXS<br>area detector scaling and<br>absorption correction  | ABSCOR (Rigaku, 1995)                                                             | SADABS2016/2 - Bruker<br>AXS area detector scaling<br>and absorption<br>correction |
| $T_{min}, T_{max}$                                                          | 0.220, 0.495                                                                     | 0.379, 0.972                                                                      | 0.45, 0.57                                                                         |
| No. of measured, independent &<br>observed [ $I > 2\sigma(I)$ ] reflections | 37958, 6204, 5934                                                                | 24863, 7781, 3493                                                                 | 61572, 6025, 4870                                                                  |
| $R_{int}$                                                                   | 0.040                                                                            | 0.171                                                                             | 0.067                                                                              |
| $(\sin \theta/\lambda)_{max}$ (Å <sup>-1</sup> )                            | 0.595                                                                            | 0.602                                                                             | 0.598                                                                              |
| $R[F^2 > 2\sigma(F^2)]$ , $wR(F^2)$ , $S$                                   | 0.027, 0.069, 1.09                                                               | 0.077, 0.214, 0.96                                                                | 0.053, 0.151, 1.03                                                                 |
| No. of reflections                                                          | 6204                                                                             | 7781                                                                              | 6025                                                                               |
| No. of parameters                                                           | 431                                                                              | 515                                                                               | 431                                                                                |
| H-atom treatment                                                            | Constrained                                                                      | Constrained                                                                       | Constrained                                                                        |
| $\Delta\rho_{max}, \Delta\rho_{min}$ (e Å <sup>-3</sup> )                   | 0.40, -0.29                                                                      | 1.01, -0.75                                                                       | 0.74, -0.51                                                                        |
